# Supplementary material
Source: publisher figshare collection journal article supplement (https://frontiersin.figshare.com/ndownloader/files/31618457)
Supplement: Supplementary file [file 31618457]

1819284\_20190302\_(P3)

visionCATS

# Analysis: 1819284\_20190302\_(P3)

Path: Home/1819284

Based on method: 1819284

|                |                                             |
|----------------|---------------------------------------------|
| Created        | 04-Mar-2019 09:52:01 Lab_Sneha              |
| Modified       | 05-Mar-2019 17:03:30 Saikat Mallick         |
| Last HPTLC log | 05-Mar-2019 17:05:07 File has been e-signed |
| Explorer notes |                                             |

| Track                | Vial ID      | Description                       | Volume | Position | Type      |
|----------------------|--------------|-----------------------------------|--------|----------|-----------|
| 1                    | RA1819284-01 | Berberine Chloride(0.1 mg/ml)     | 1.0 µl | B1       | Reference |
| 2                    | RA1819284-01 | Berberine Chloride(0.1 mg/ml)     | 2.0 µl | B1       | Reference |
| 3                    | RA1819284-01 | Berberine Chloride(0.1 mg/ml)     | 3.0 µl | B1       | Reference |
| 4                    | RA1819284-01 | Berberine Chloride(0.1 mg/ml)     | 4.0 µl | B1       | Reference |
| 5                    | RA1819284-01 | Berberine Chloride(0.1 mg/ml)     | 5.0 µl | B1       | Reference |
| 6                    | RA1819284-01 | Berberine Chloride(0.1 mg/ml)     | 6.0 µl | B1       | Reference |
| 7                    | RA1819284-01 | Berberine Chloride(0.1 mg/ml)     | 7.0 µl | B1       | Reference |
| 8                    | SA1819284-01 | Berberis aristata(10 mg/ml)_1:100 | 2.0 µl | B2       | Sample    |
| 9                    | SA1819284-01 | Berberis aristata(10 mg/ml)_1:100 | 2.0 µl | B2       | Sample    |
| 10                   | SA1819284-01 | Berberis aristata(10 mg/ml)_1:100 | 5.0 µl | B2       | Sample    |
| 11                   | SA1819284-01 | Berberis aristata(10 mg/ml)_1:100 | 5.0 µl | B2       | Sample    |
| 12                   | SA1819284-01 | Berberis aristata(10 mg/ml)_1:100 | 5.0 µl | B2       | Sample    |
| Sequence table notes |              |                                   |        |          |           |

A track marked with ⚠ means: the application type is overridden in some evaluation(s).

## System setup:

|            |                                                  |
|------------|--------------------------------------------------|
| Software   | Server VisionCATS-Server-PH, version 2.5.18262.1 |
| ATS4       | S/N:250243 (NEW ATS4)                            |
| Chamber    | N/A                                              |
| Scanner4   | S/N:170422 (SCANNER 4)                           |
| Visualizer | S/N:150503 (VISUALIZER)                          |

## Chromatography

### Plate layout:

|                        |                                                   |
|------------------------|---------------------------------------------------|
| Stationary phase       | Merck, TLC plates Al silica gel 60 F 254          |
| Plate format           | 200.0 x 100.0 mm                                  |
| Application type       | BandIntertrack                                    |
| Application            | Position Y: 8.0 mm, length: 8.0 mm, width: 0.0 mm |
| Track                  | First position X: 20.0 mm, distance: 14.0 mm      |
| Solvent front position | 70.0 mm                                           |
| Notes                  |                                                   |

### Take image clean plate 1a - Visualizer (S/N: 150503):

|                          |                                      |
|--------------------------|--------------------------------------|
| Quality                  | Enhanced                             |
| R White                  | auto capture, Auto, level 85 %, Band |
| R 254                    | auto capture, Auto, level 85 %, Band |
| R 366                    | auto capture, Auto, level 85 %, Band |
| Instrument diagnostics   | Valid diagnostics                    |
| Documentation step label |                                      |
| Notes                    |                                      |

### Application 1 - ATS 4 (S/N: 250243):

1819284\_20190302\_(P3)

visionCATS

|                         |                   |
|-------------------------|-------------------|
| Spray gas               | Air               |
| Sample solvent type     | Methanol          |
| Filling speed           | 15 µl/s           |
| Predosage volume        | 200 nl            |
| Retraction volume       | 200 nl            |
| Dosage speed            | 150 nl/s          |
| Filling quality         | Standard          |
| Rinsing cycles / vacuum | 1 / 4 s           |
| Filling cycles / vacuum | 1 / 4 s           |
| Rinsing solvent name    | Methanol          |
| Nozzle temperature      | Unheated          |
| Rack in use             |                   |
| Instrument diagnostics  | Valid diagnostics |
| Notes                   |                   |

### Development 1 - Chamber:

|                      |                                         |
|----------------------|-----------------------------------------|
| Tank                 | TTC 20x10                               |
| Mobile phase         | n butanol:acetic acid:water(3:1:1)v/v/v |
| Saturation time      | 20 min                                  |
| Use saturation pad   | true                                    |
| Use smartALERT       | false                                   |
| Volume front through | 10 ml                                   |
| Volume rear through  | 10 ml                                   |
| Drying time          | 5 min                                   |
| Drying temperature   | Room temperature                        |
| Notes                |                                         |

### Take image developed plate 1a - Visualizer (S/N: 150503):

|                          |                                      |
|--------------------------|--------------------------------------|
| Quality                  | Enhanced                             |
| R White                  | auto capture, Auto, level 85 %, Band |
| R 366                    | auto capture, Auto, level 85 %, Band |
| Instrument diagnostics   | Valid diagnostics                    |
| Documentation step label |                                      |
| Notes                    |                                      |

### Take image developed plate 1b - Visualizer (S/N: 150503):

|                          |                                      |
|--------------------------|--------------------------------------|
| Quality                  | Enhanced                             |
| R 254                    | auto capture, Auto, level 85 %, Band |
| Instrument diagnostics   | Valid diagnostics                    |
| Documentation step label |                                      |
| Notes                    |                                      |

### Scan developed plate 1c - Scanner 4 (S/N: 170422):

|                          |                   |
|--------------------------|-------------------|
| Scanner type             | Single λ          |
| Optimization for         | Resolution        |
| Measurement mode         | Absorption        |
| Filter                   | n/a               |
| Detector mode            | Automatic         |
| Scanning speed           | 20 mm/s           |
| Data resolution          | 100 µm/step       |
| Slit                     | 5 x 0.2 mm, micro |
| Partial scan             | No                |
| Lamp                     | Deuterium         |
| Wavelength(s)            | 254 nm            |
| Instrument diagnostics   | Valid diagnostics |
| Documentation step label |                   |
| Notes                    |                   |

## Scan developed plate 1d - Scanner 4 (S/N: 170422):

|                          |                              |
|--------------------------|------------------------------|
| Scanner type             | Single $\lambda$             |
| Optimization for         | Light (sensitivity)          |
| Measurement mode         | Absorption                   |
| Filter                   | n/a                          |
| Detector mode            | Automatic                    |
| Scanning speed           | 20 mm/s                      |
| Data resolution          | 25 $\mu\text{m}/\text{step}$ |
| Slit                     | 6 x 0.45 mm, micro           |
| Partial scan             | No                           |
| Lamp                     | Mercury                      |
| Wavelength(s)            | 366 nm                       |
| Instrument diagnostics   | Valid diagnostics            |
| Documentation step label |                              |
| Notes                    |                              |

## Spectrum Scan developed plate 1e - Scanner 4 (S/N: 170422):

|                          |                                 |
|--------------------------|---------------------------------|
| Scanner type             | Spectrum                        |
| Optimization for         | Light (sensitivity)             |
| Measurement mode         | Absorption                      |
| Filter                   | n/a                             |
| Detector mode            | Automatic                       |
| Spectrum speed           | 20 nm/s                         |
| Data resolution          | 1 nm                            |
| Slit                     | 6 x 0.45 mm, micro              |
| Lamp                     | Deuterium                       |
| Wavelength range         | 190 nm to 450 nm                |
| Reference spectrum       | Per plate, X=10.0 mm, Y=10.0 mm |
| Purity                   | No                              |
| Instrument diagnostics   | Valid diagnostics               |
| Documentation step label |                                 |
| Notes                    |                                 |

## Substance berberine HCl (Rf. 0.488 +/- 0.033):

| Track | Rf    | X (mm) | Y (mm) |
|-------|-------|--------|--------|
| 1     | 0.485 | 20.0   | 38.1   |
| 2     | 0.481 | 34.0   | 37.8   |
| 3     | 0.482 | 48.0   | 37.9   |
| 4     | 0.481 | 62.0   | 37.8   |
| 5     | 0.481 | 76.0   | 37.8   |
| 6     | 0.489 | 90.0   | 38.3   |
| 7     | 0.492 | 104.0  | 38.5   |
| 8     | 0.489 | 118.0  | 38.3   |
| 9     | 0.490 | 132.0  | 38.4   |
| 10    | 0.502 | 146.0  | 39.1   |
| 11    | 0.505 | 160.0  | 39.3   |
| 12    | 0.506 | 174.0  | 39.4   |

## System suitability tests:

### SST settings:

|            |  |
|------------|--|
| SST tracks |  |
|------------|--|

## Data acquisition

1819284\_20190302\_(P3)

visionCATS

## Application 1 - ATS 4 (S/N: 250243):

Executed 04-Mar-2019 10:37:10 Lab\_Sneha

## Development 1 - Chamber:

Executed 04-Mar-2019 11:42:10 Lab\_Sneha

## Take image developed plate 1a - Visualizer (S/N: 150503):

Executed 04-Mar-2019 11:47:21 Lab\_Sneha

R White

Developed, RemissionVis

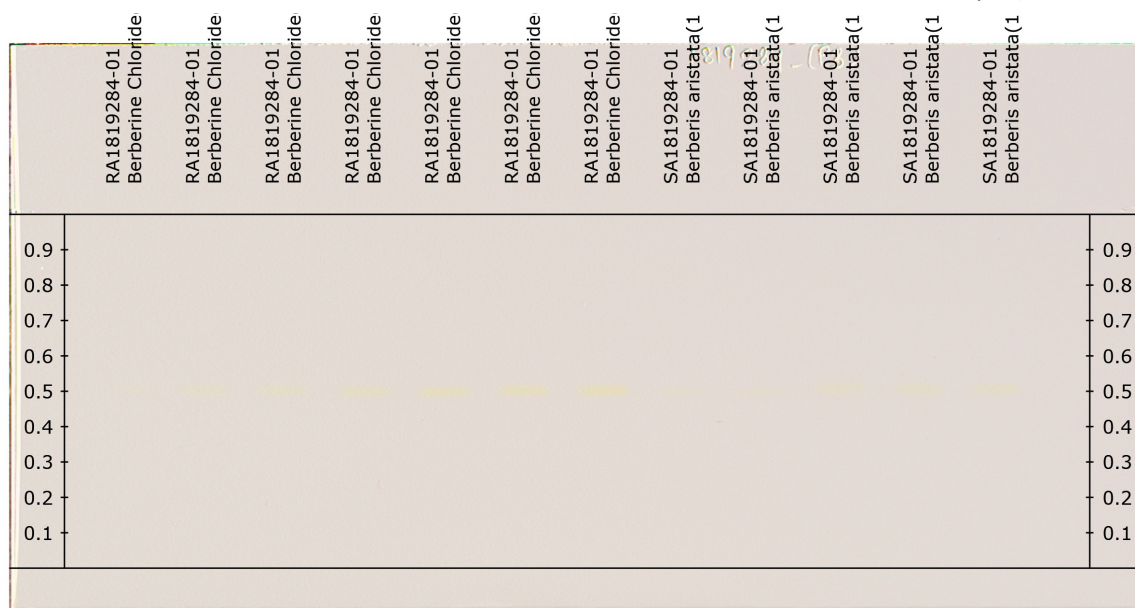

|                     |                  |
|---------------------|------------------|
| Exposure            | 0.065 s          |
| Contrast            | 1                |
| Normalized exposure | Disabled         |
| Clarify             | Disabled         |
| White balance       | 1.00, 1.00, 1.00 |

1819284\_20190302\_(P3)

visionCATS

R 366

Developed, Remission366

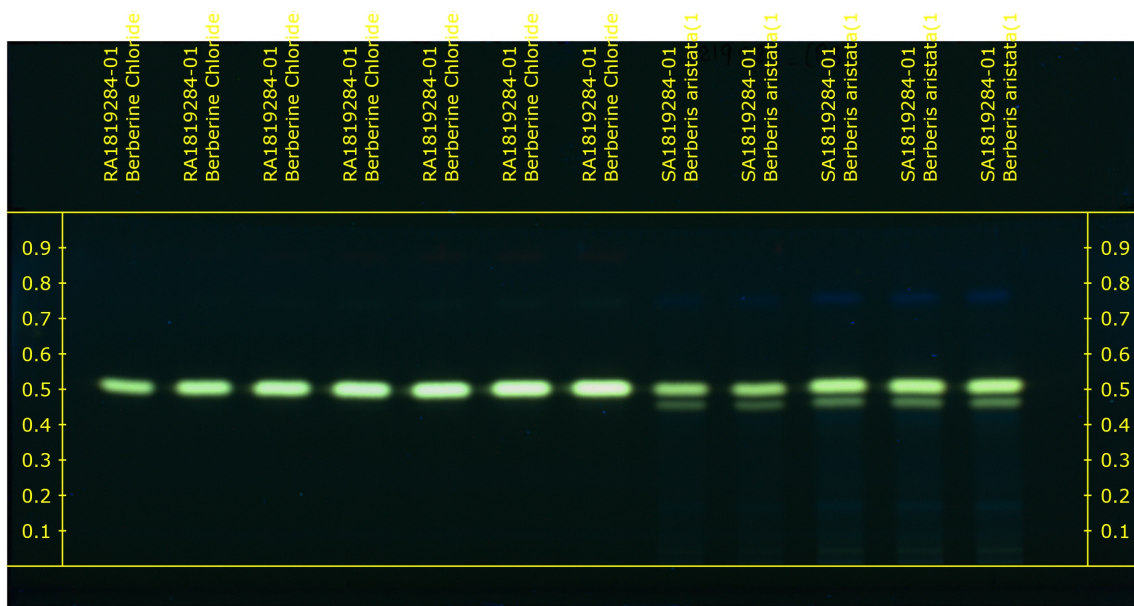

|                     |                  |
|---------------------|------------------|
| Exposure            | 0.273 s          |
| Contrast            | 1                |
| Normalized exposure | Enabled          |
| Clarify             | Disabled         |
| White balance       | 1.00, 1.00, 1.00 |

Take image developed plate 1b - Visualizer (S/N: 150503):

|          |                                |
|----------|--------------------------------|
| Executed | 04-Mar-2019 12:07:49 Lab_Sneha |
|----------|--------------------------------|

R 254

Developed, Remission254

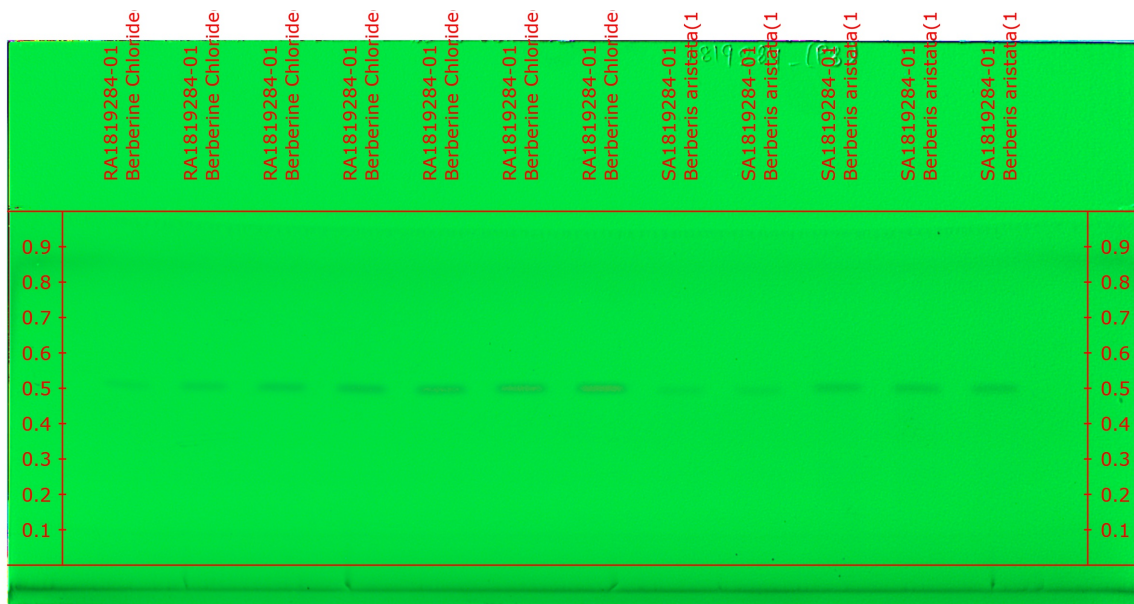

|                     |                  |
|---------------------|------------------|
| Exposure            | 0.340 s          |
| Contrast            | 1                |
| Normalized exposure | Disabled         |
| Clarify             | Disabled         |
| White balance       | 1.00, 1.00, 1.00 |

Scan developed plate 1c - Scanner 4 (S/N: 170422):

|          |                                |
|----------|--------------------------------|
| Executed | 04-Mar-2019 12:10:04 Lab_Sneha |
|----------|--------------------------------|



1819284\_20190302\_(P3)

visionCATS

Scan:

Wavelength 254 nm

Track 1:

Type Single  $\lambda$

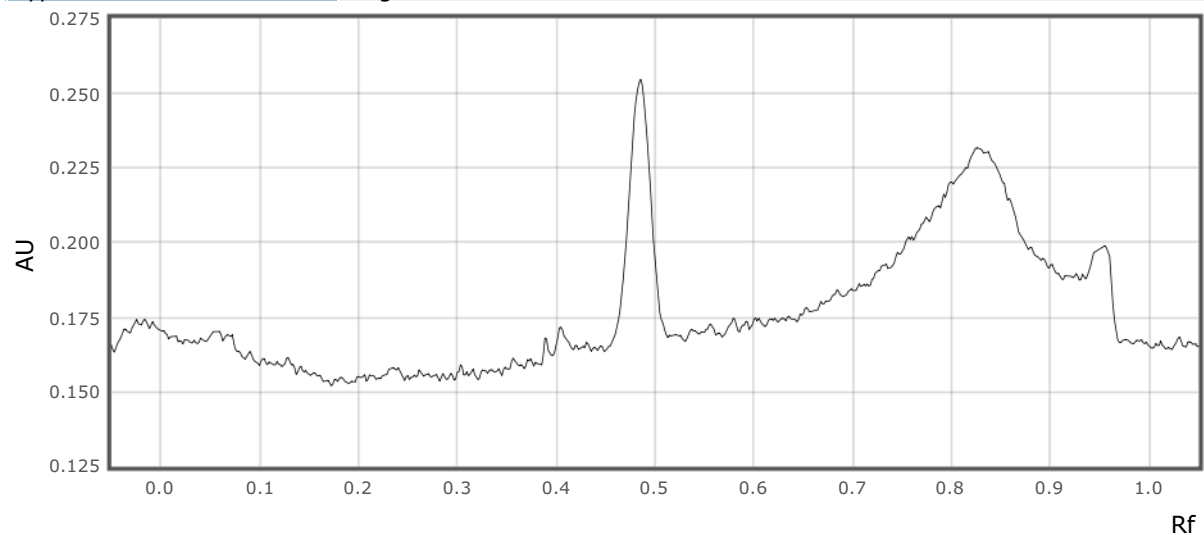

Track 2:

Type Single  $\lambda$

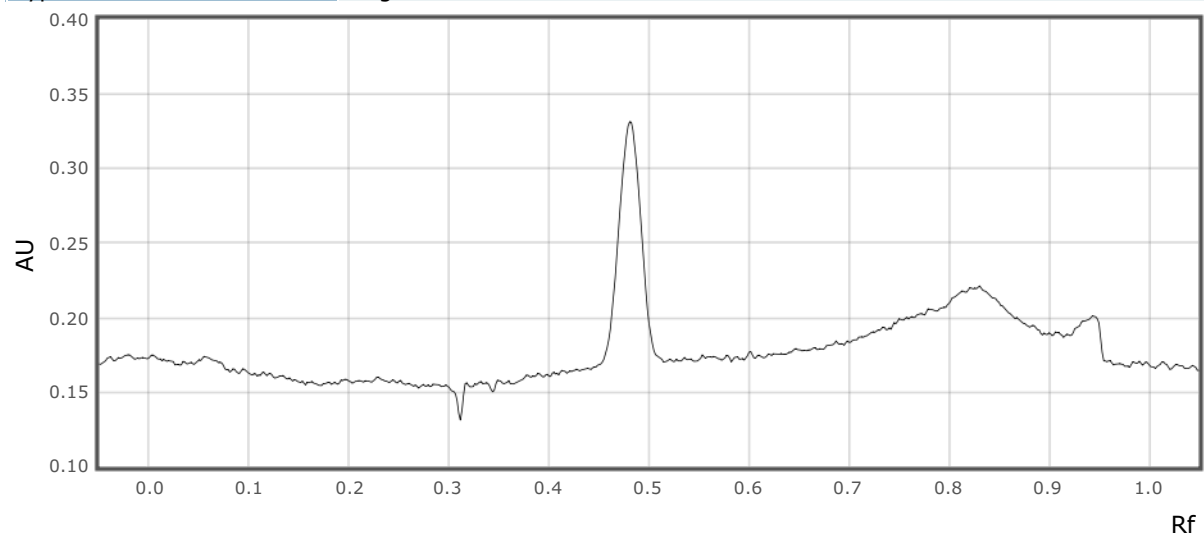

Track 3:

Type Single  $\lambda$

1819284\_20190302\_(P3)

visionCATS

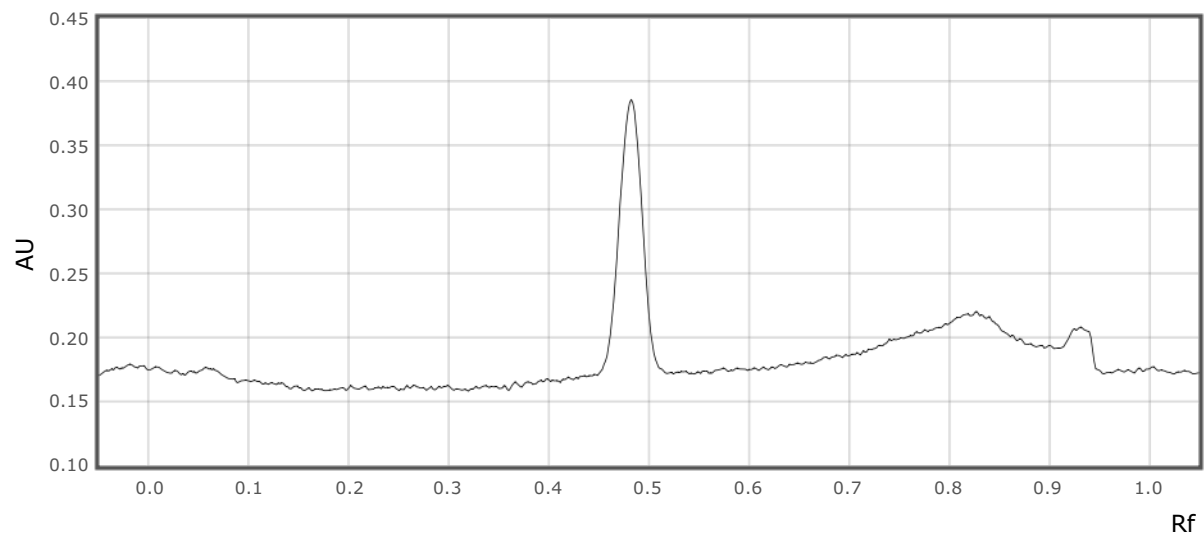

Track 4:

Type Single  $\lambda$

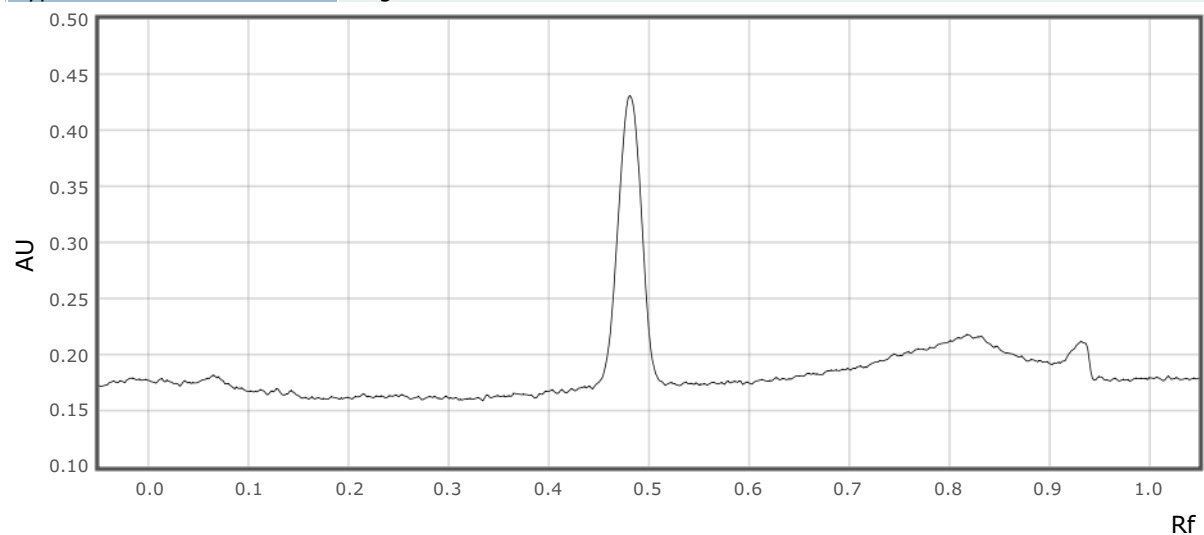

Track 5:

Type Single  $\lambda$

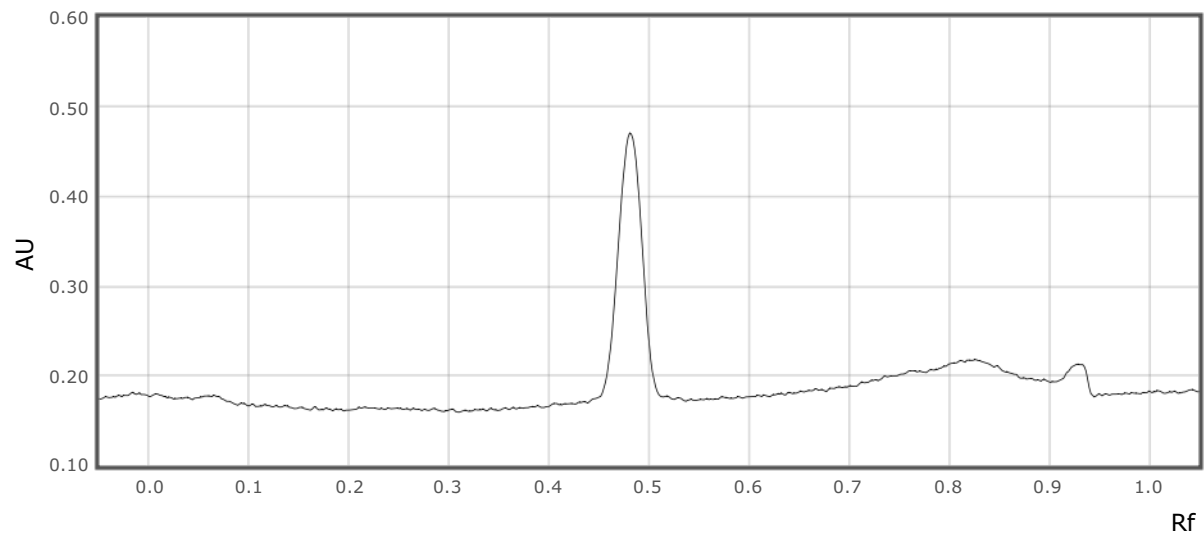

1819284\_20190302\_(P3)

visionCATS

Track 6:

Type Single  $\lambda$

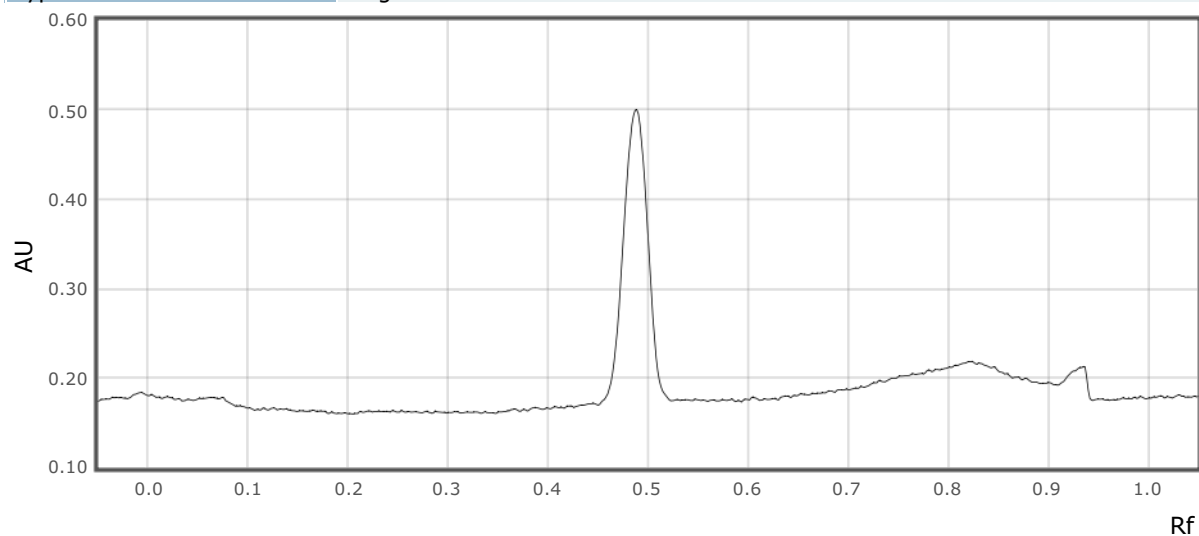

Track 7:

Type Single  $\lambda$

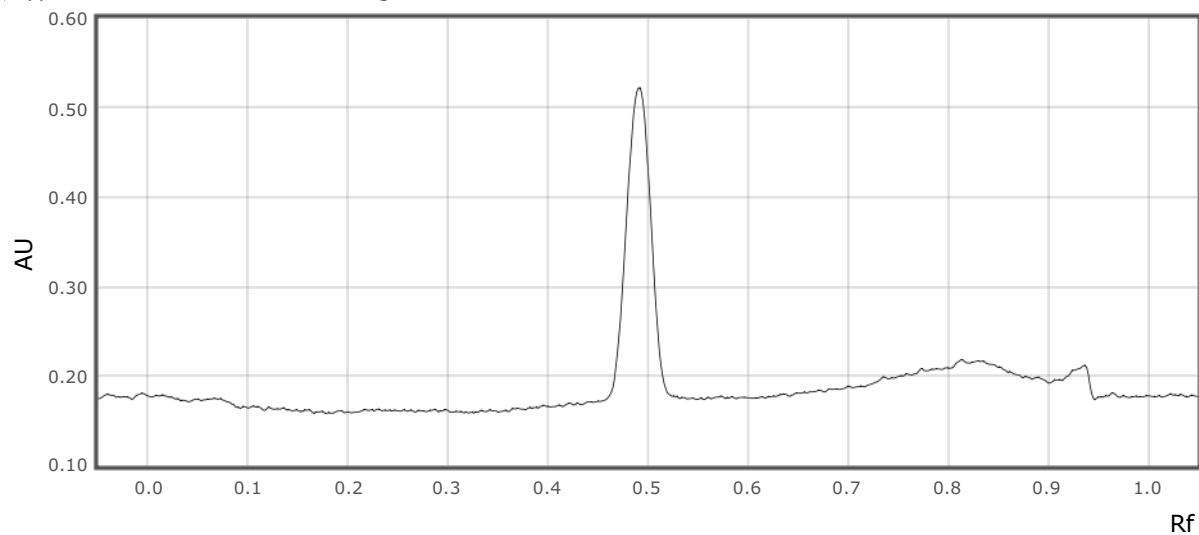

Track 8:

Type Single  $\lambda$



1819284\_20190302\_(P3)

visionCATS

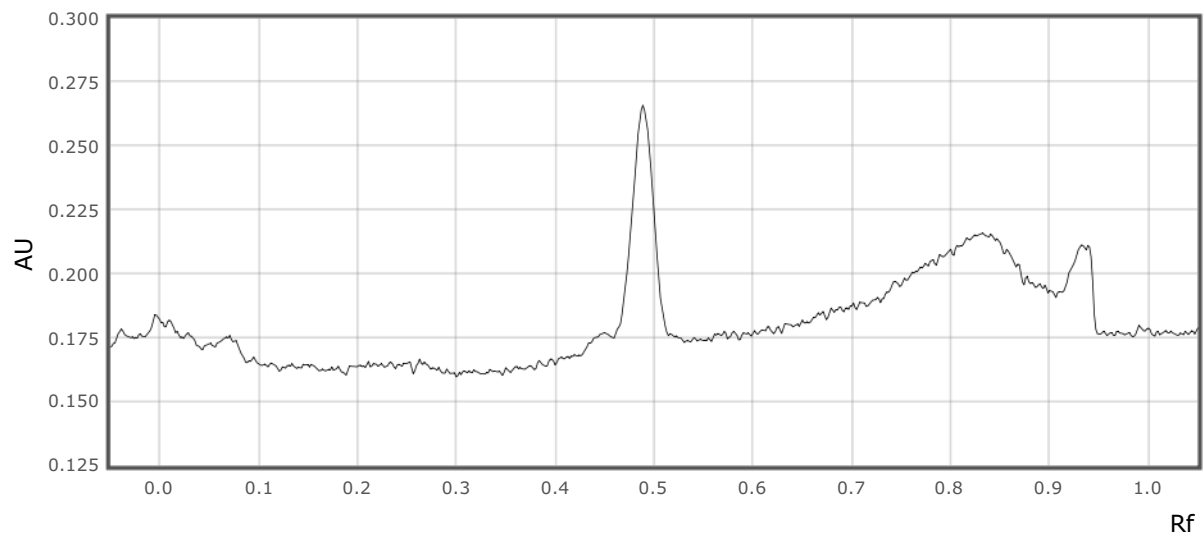

Track 9:

Type Single  $\lambda$

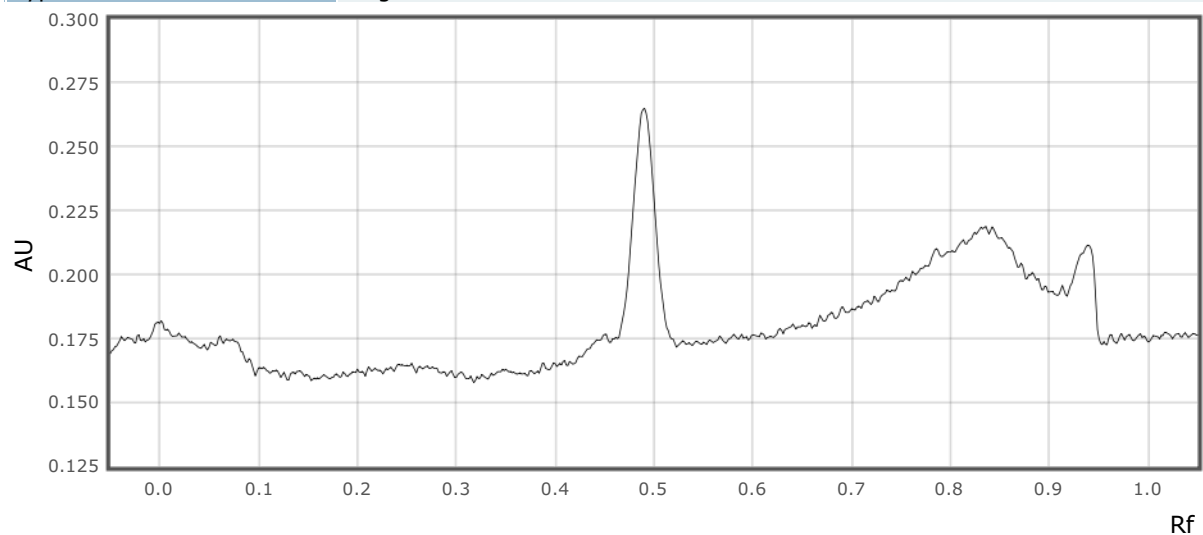

Track 10:

Type Single  $\lambda$

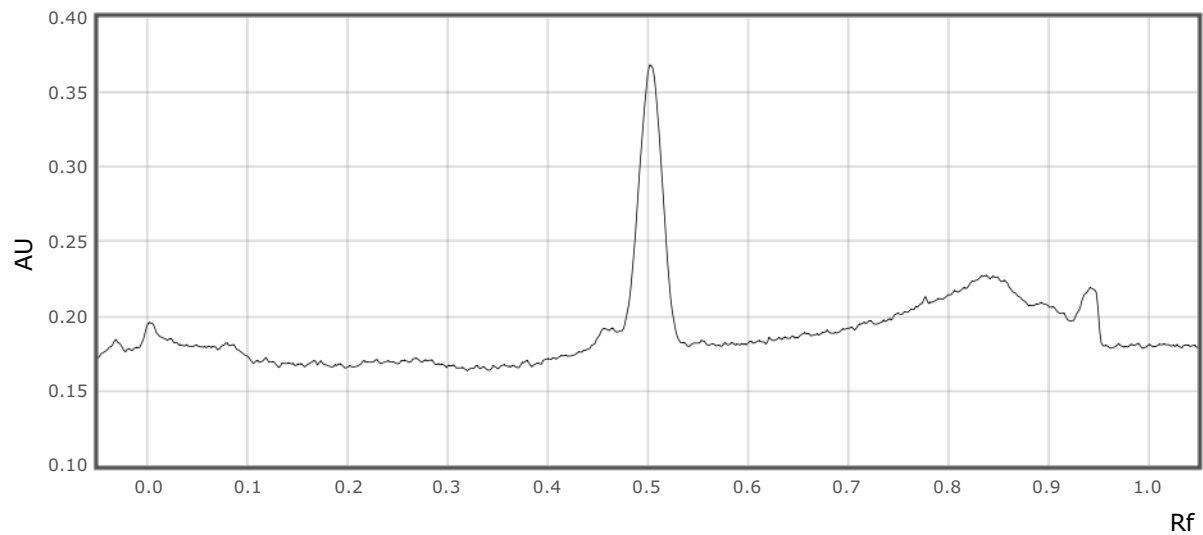

1819284\_20190302\_(P3)

visionCATS

Track 11:

Type Single  $\lambda$

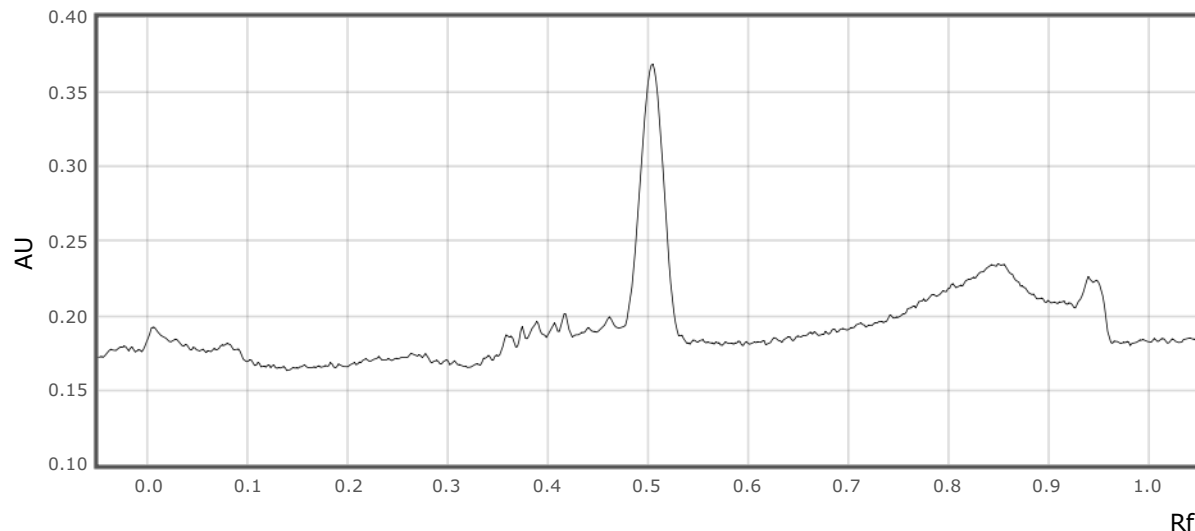

Track 12:

Type Single  $\lambda$

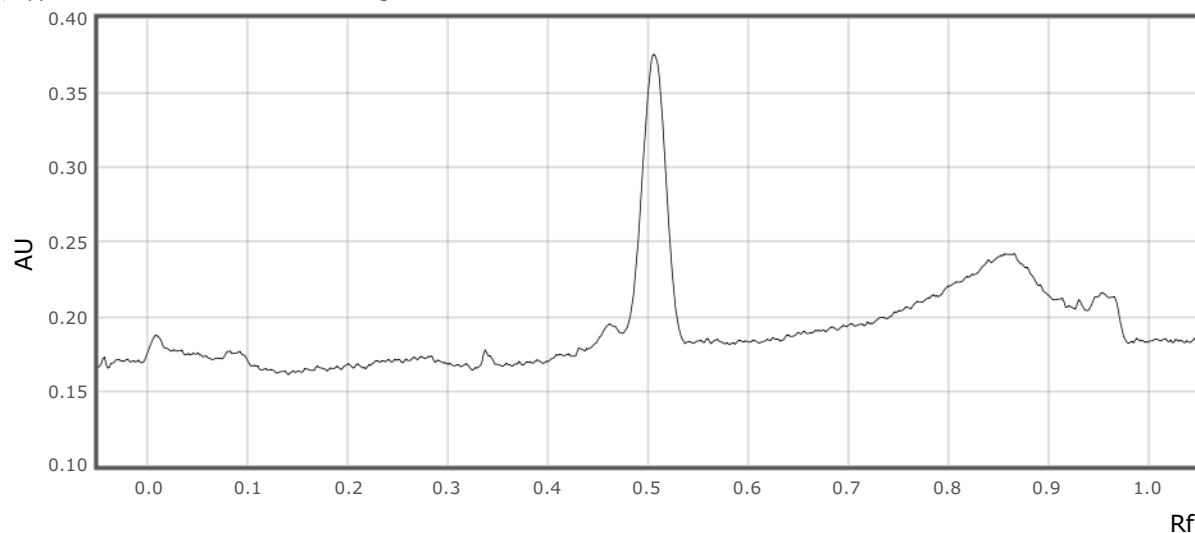

Scan developed plate 1d - Scanner 4 (S/N: 170422):

Executed 04-Mar-2019 12:12:14 Lab\_Sneha

Scan:

Wavelength 366 nm

Track 1:

Type Single  $\lambda$

1819284\_20190302\_(P3)

visionCATS

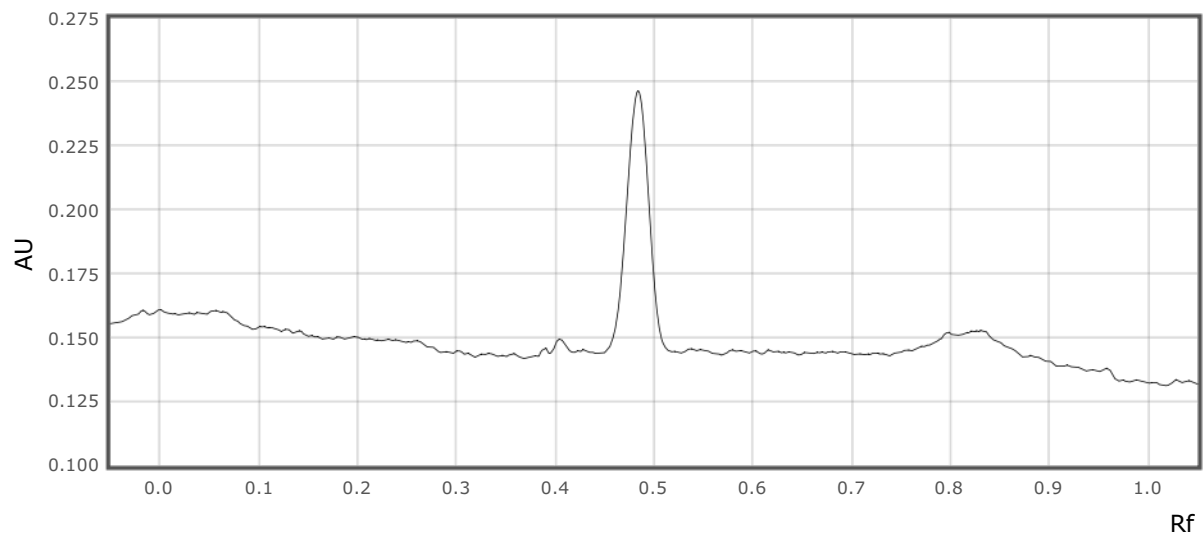

Track 2:

Type Single  $\lambda$

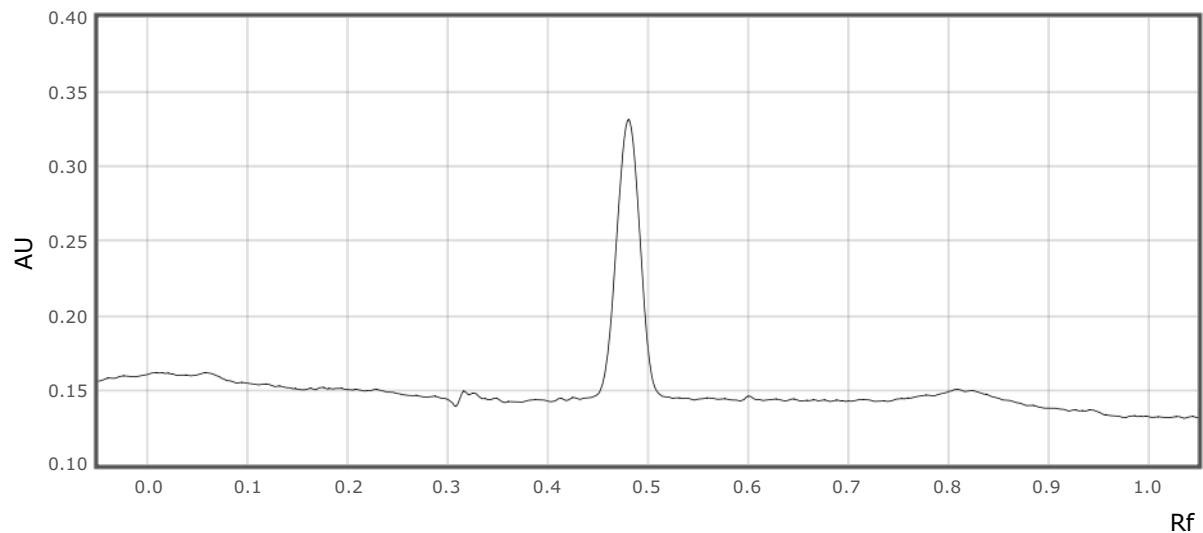

Track 3:

Type Single  $\lambda$

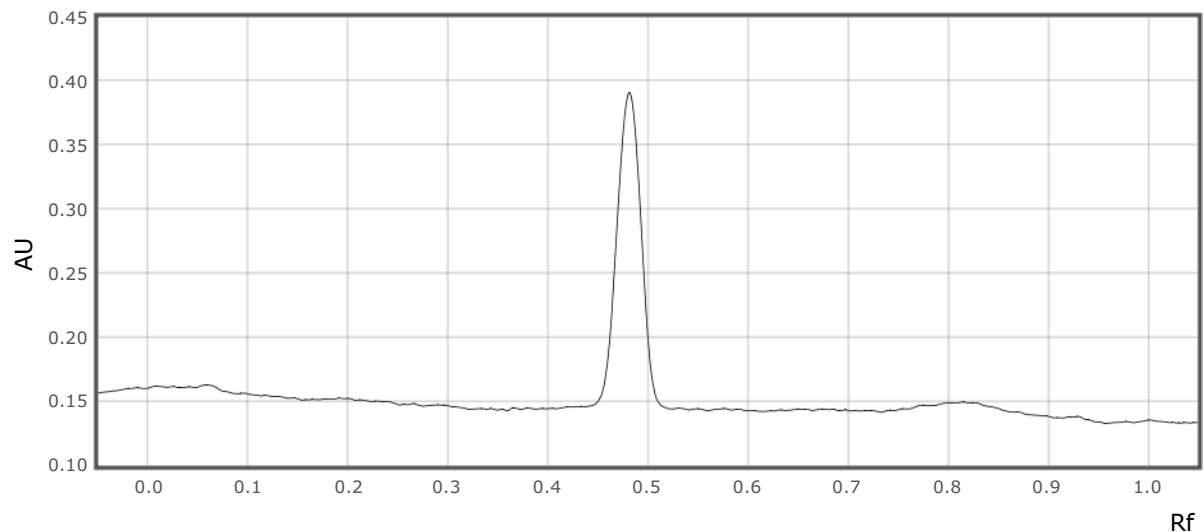

1819284\_20190302\_(P3)

visionCATS

#### Track 4:

Type Single  $\lambda$

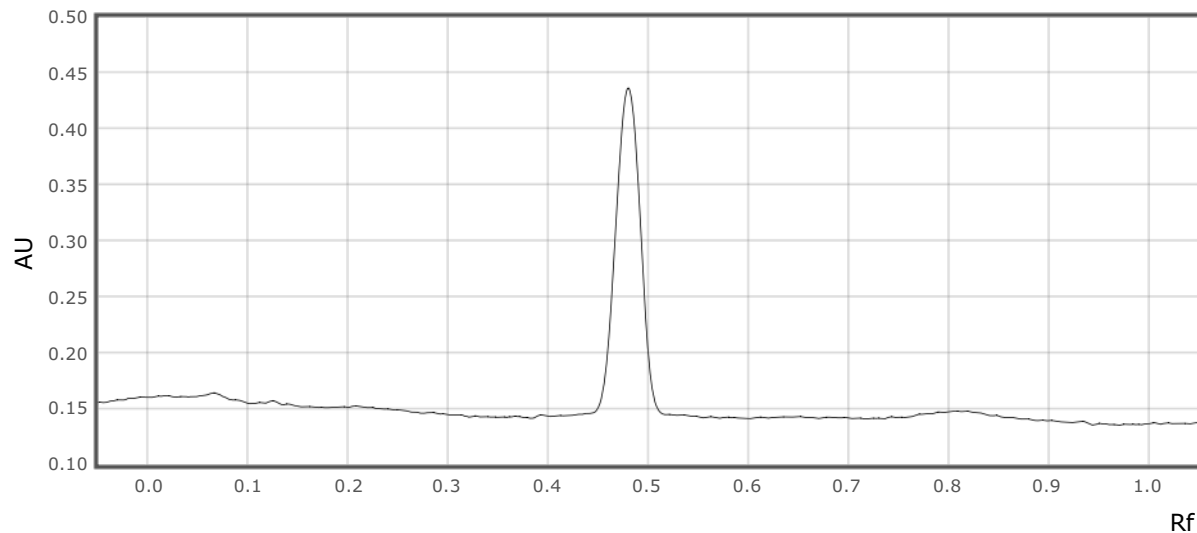

#### Track 5:

Type Single  $\lambda$

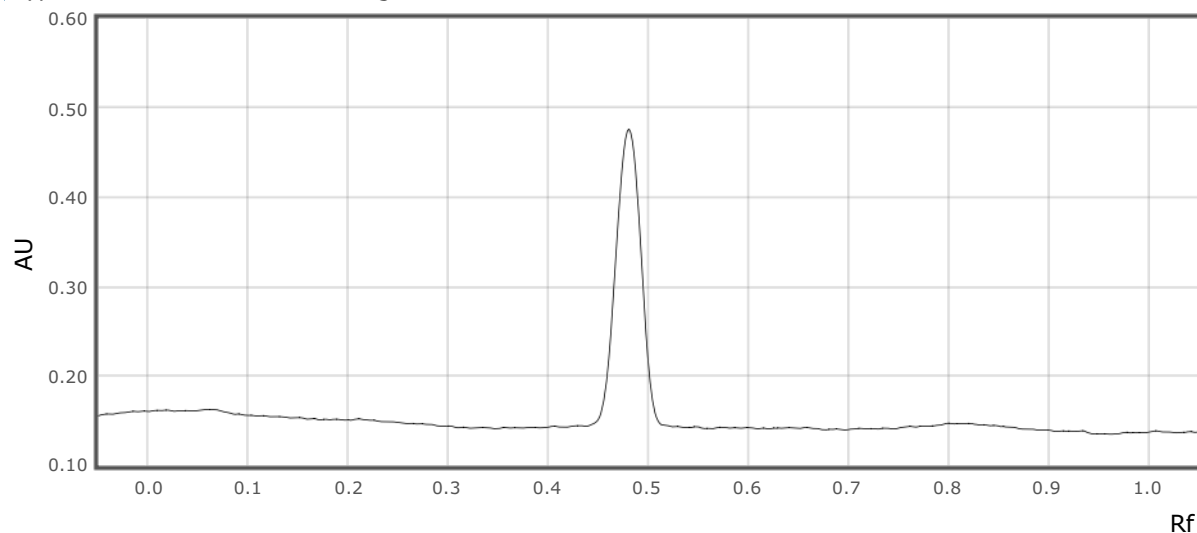

#### Track 6:

Type Single  $\lambda$

1819284\_20190302\_(P3)

visionCATS

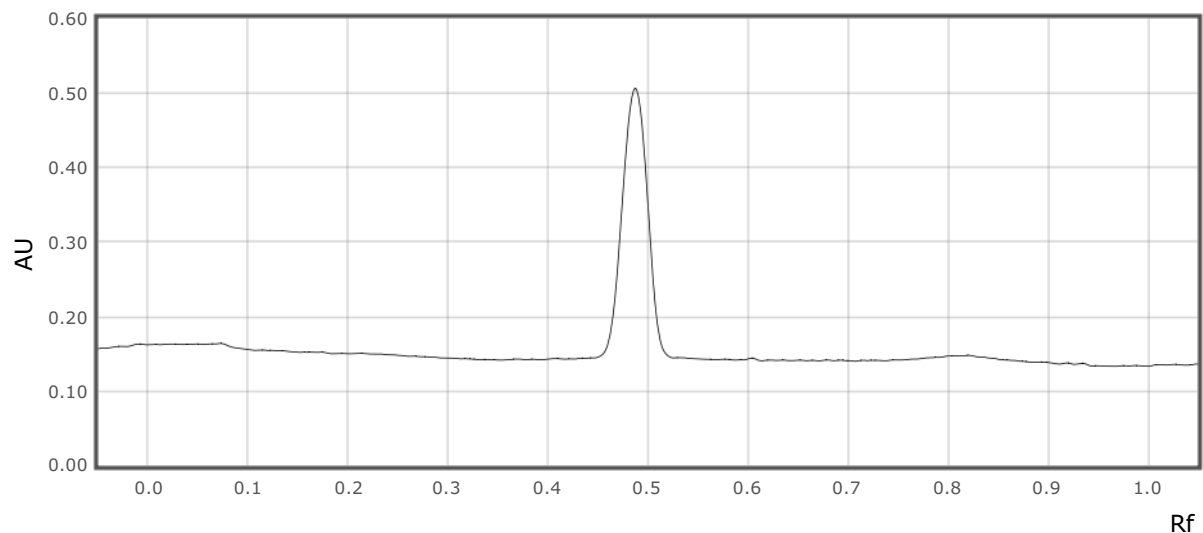

Track 7:

Type Single  $\lambda$

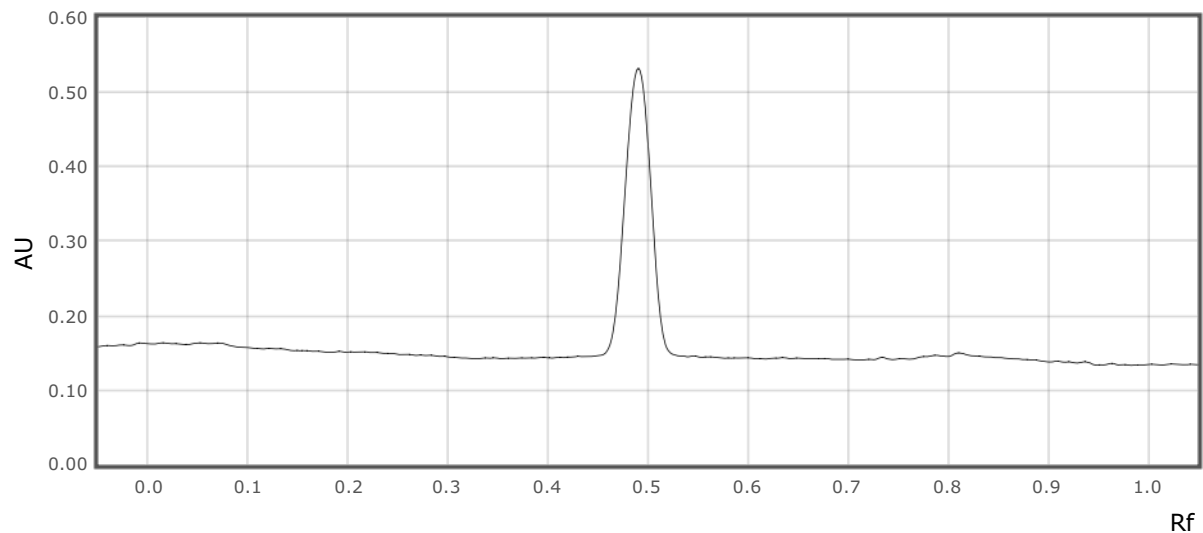

Track 8:

Type Single  $\lambda$

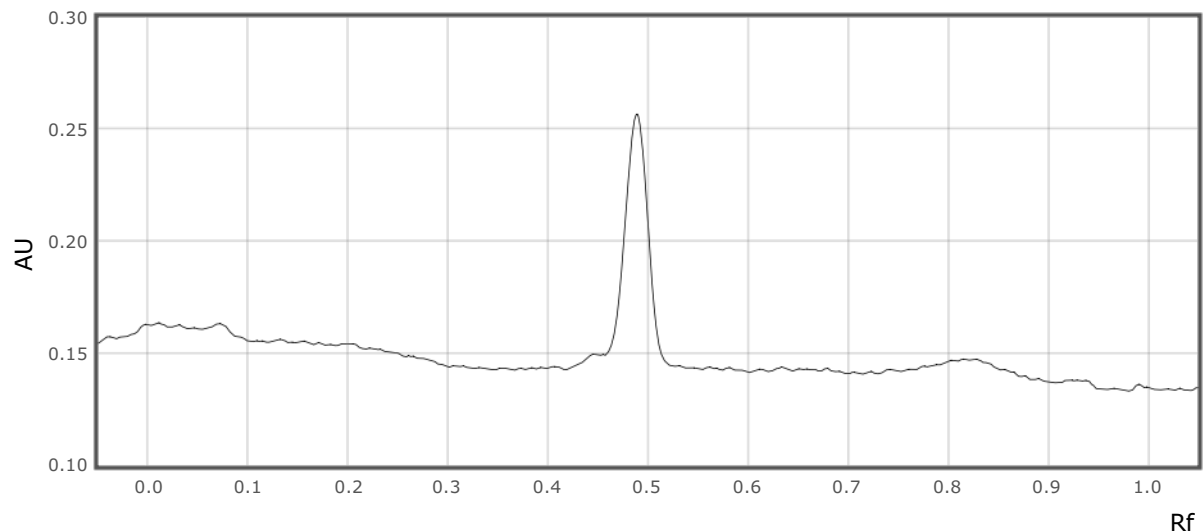

1819284\_20190302\_(P3)

visionCATS

Track 9:

Type Single  $\lambda$

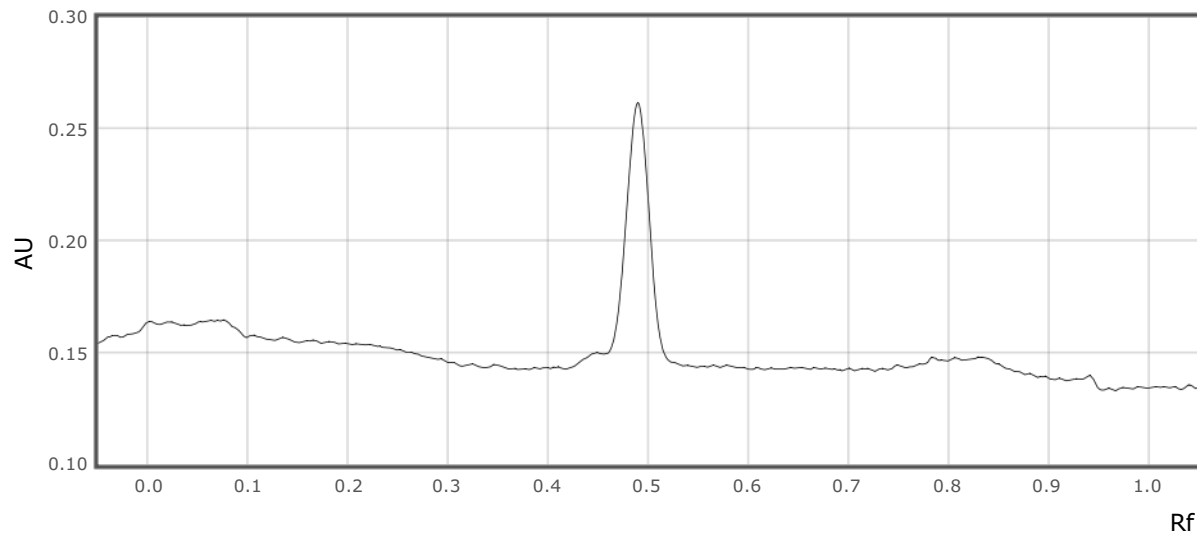

Track 10:

Type Single  $\lambda$

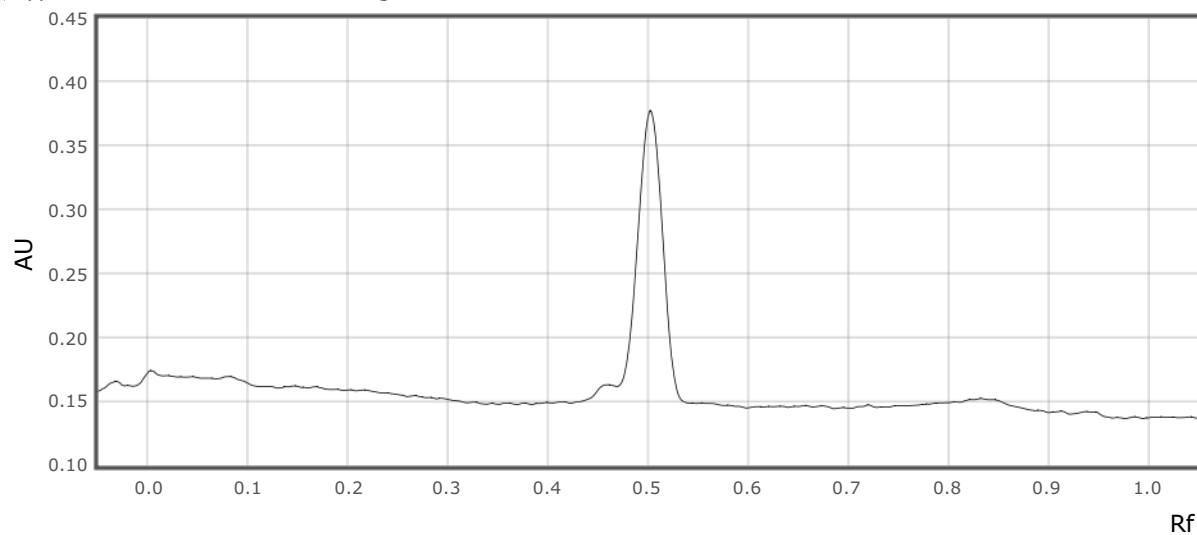

Track 11:

Type Single  $\lambda$

1819284\_20190302\_(P3)

visionCATS

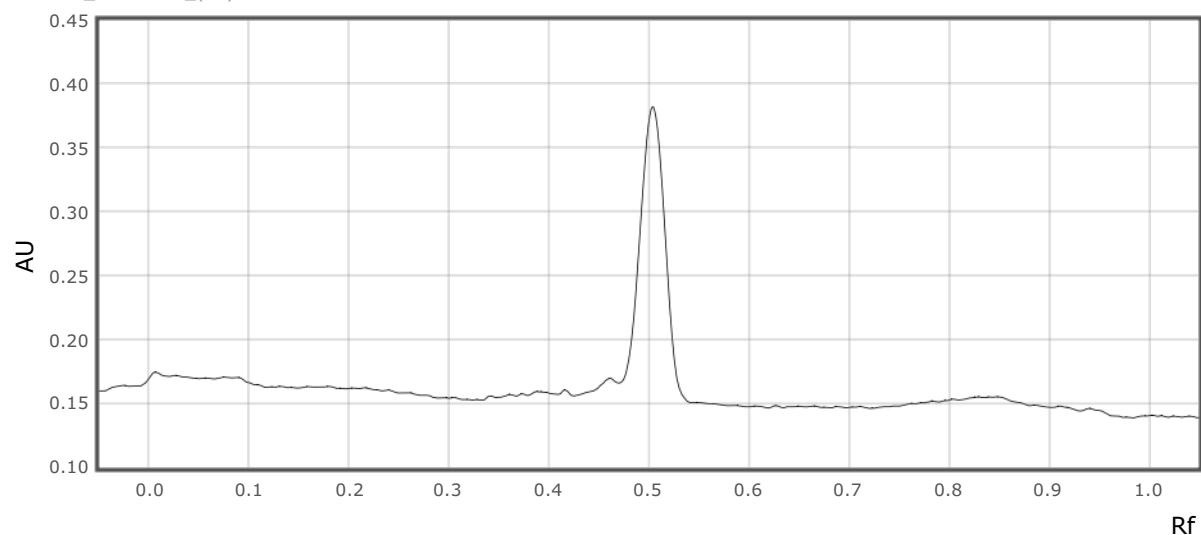

Track 12:

Type Single  $\lambda$

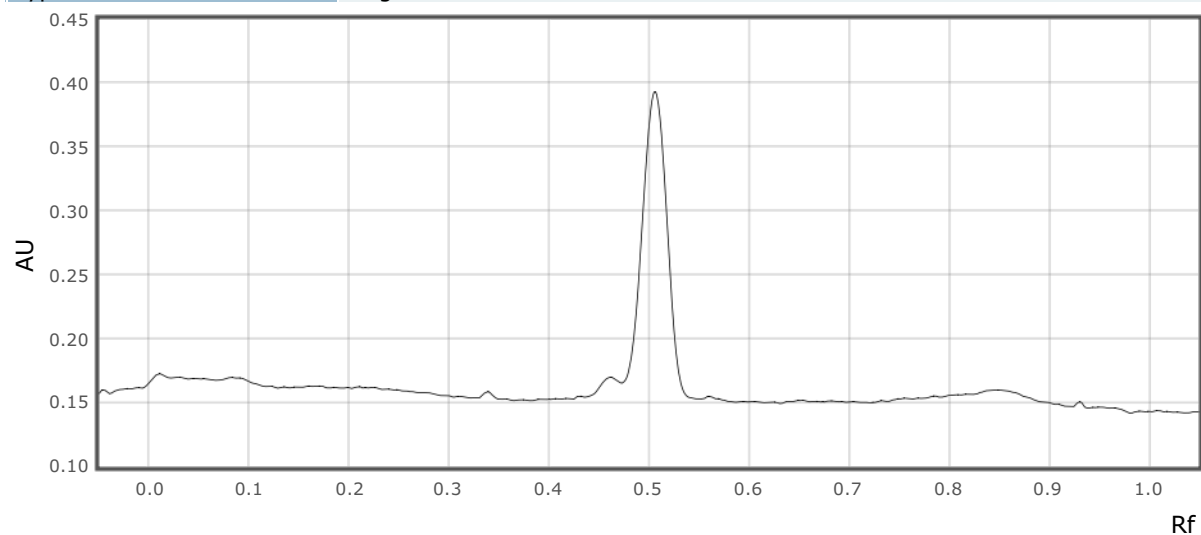

Spectrum Scan developed plate 1e - Scanner 4 (S/N: 170422):

Executed 04-Mar-2019 12:18:53 Lab\_Sneha

Substance berberine HCl (Rf. 0.488 +/- 0.033):

Tr. 1 Rf 0.485 (20.0 mm, 38.1 mm)



1819284\_20190302\_(P3)

visionCATS

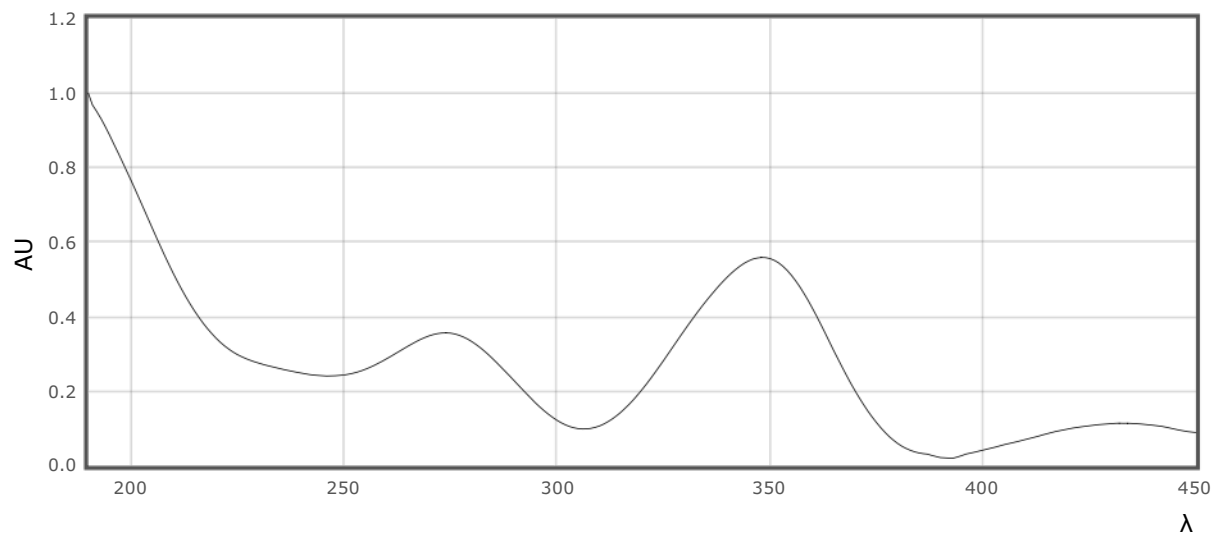

Tr. 2 Rf 0.481 (34.0 mm, 37.8 mm)

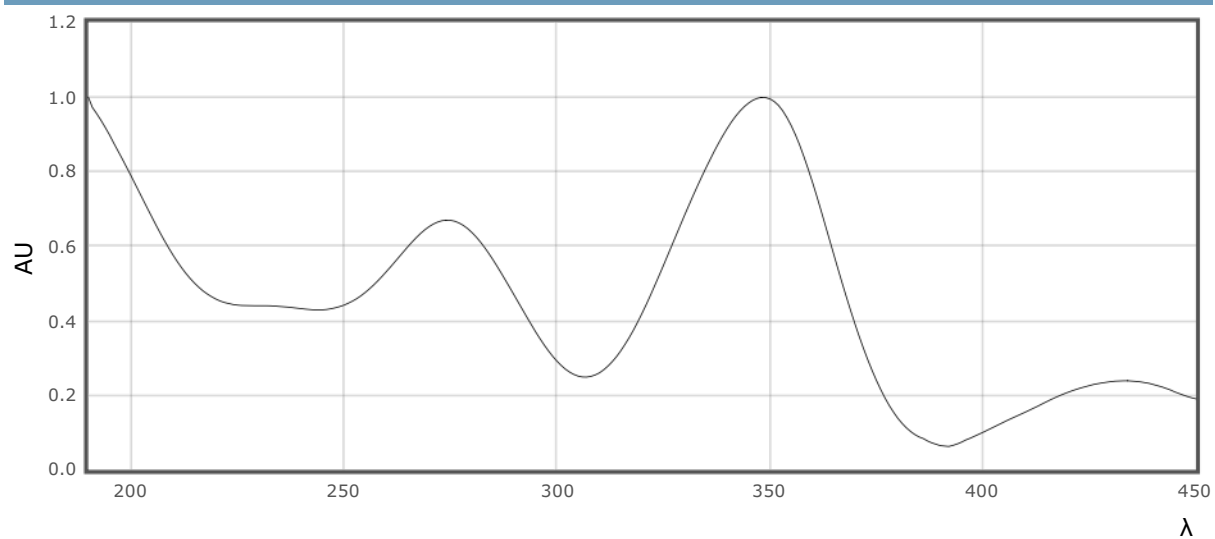

Tr. 3 Rf 0.482 (48.0 mm, 37.9 mm)

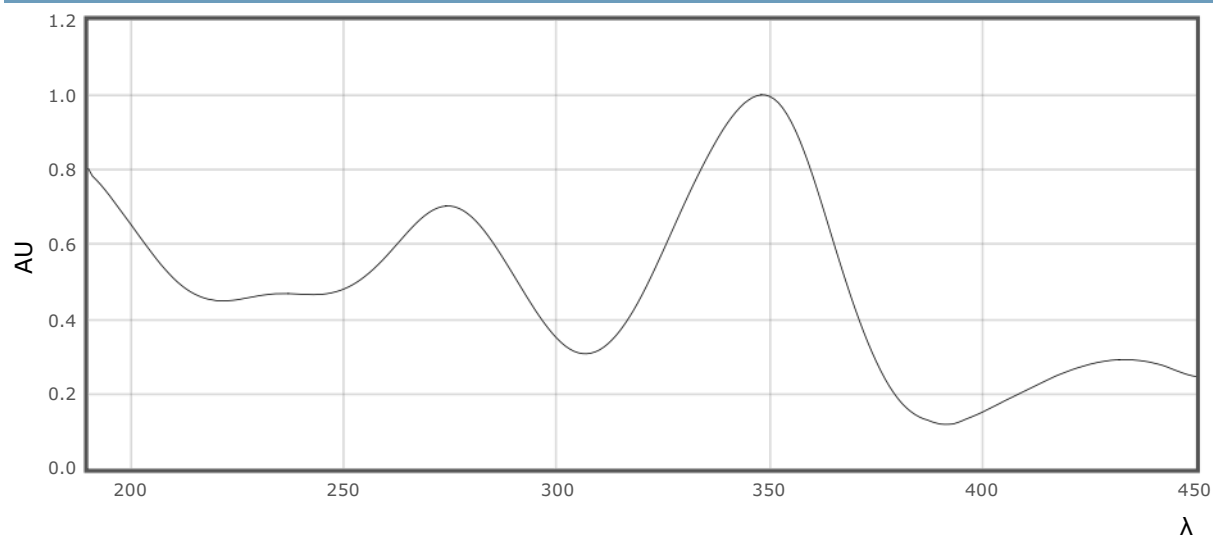

Tr. 4 Rf 0.481 (62.0 mm, 37.8 mm)

1819284\_20190302\_(P3)

visionCATS

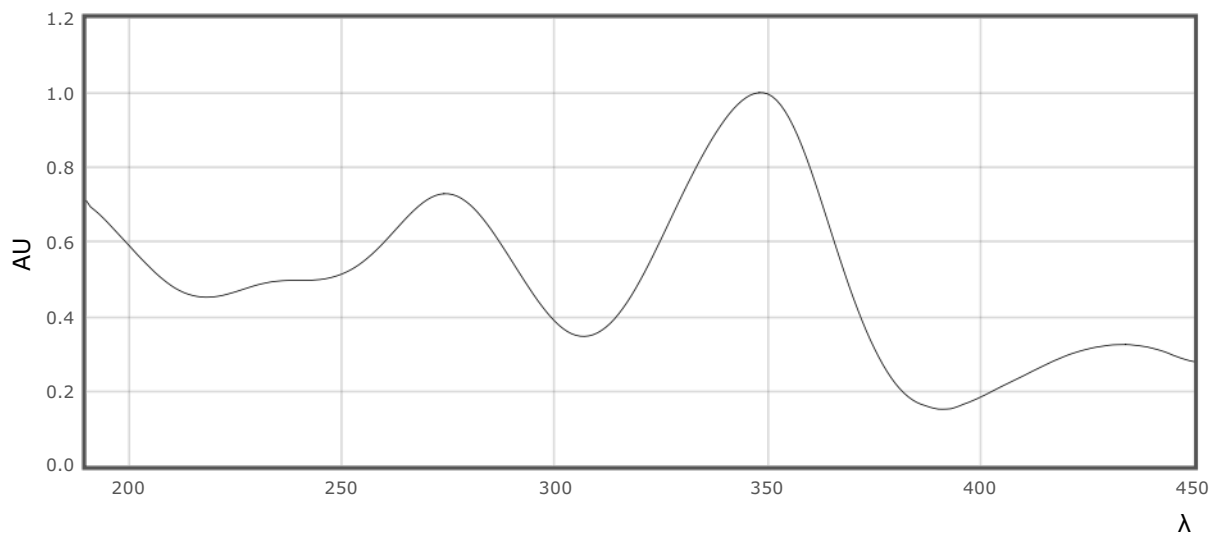

Tr. 5 Rf 0.481 (76.0 mm, 37.8 mm)

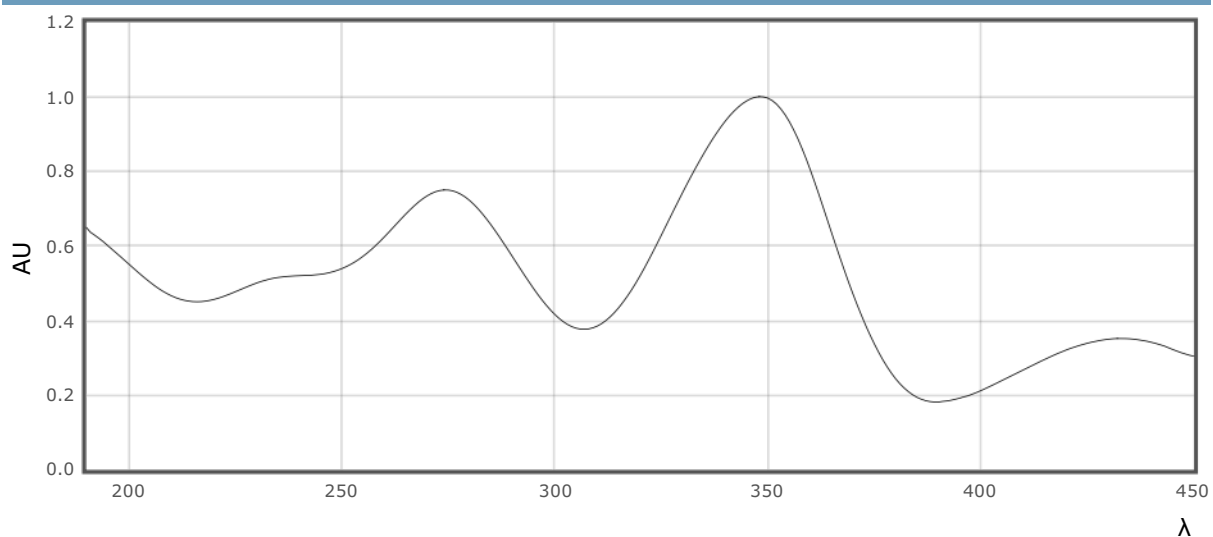

Tr. 6 Rf 0.489 (90.0 mm, 38.3 mm)

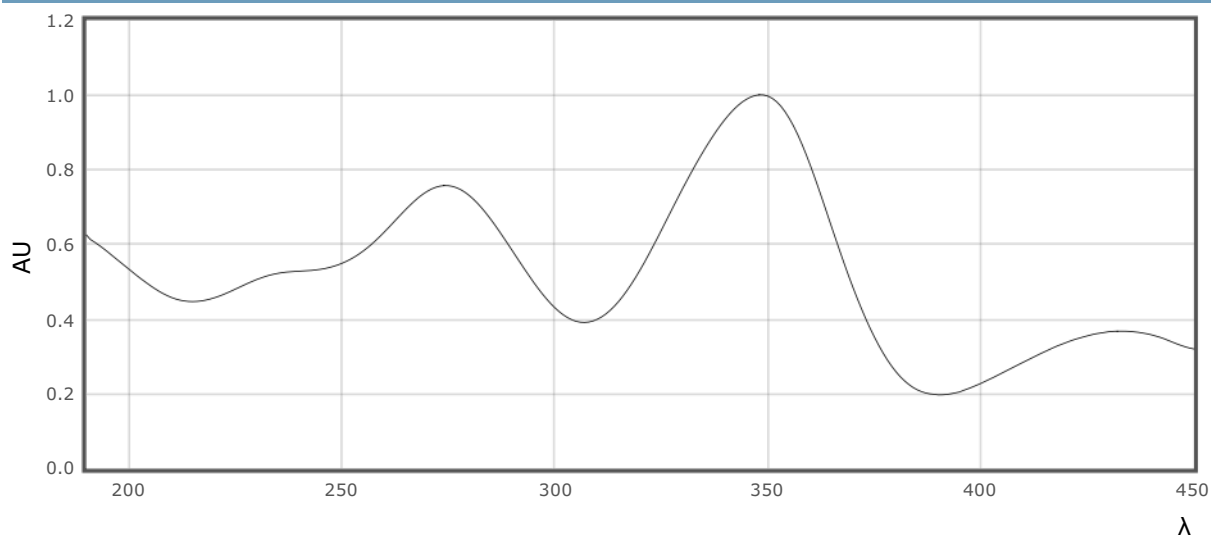

Tr. 7 Rf 0.492 (104.0 mm, 38.5 mm)

1819284\_20190302\_(P3)

visionCATS

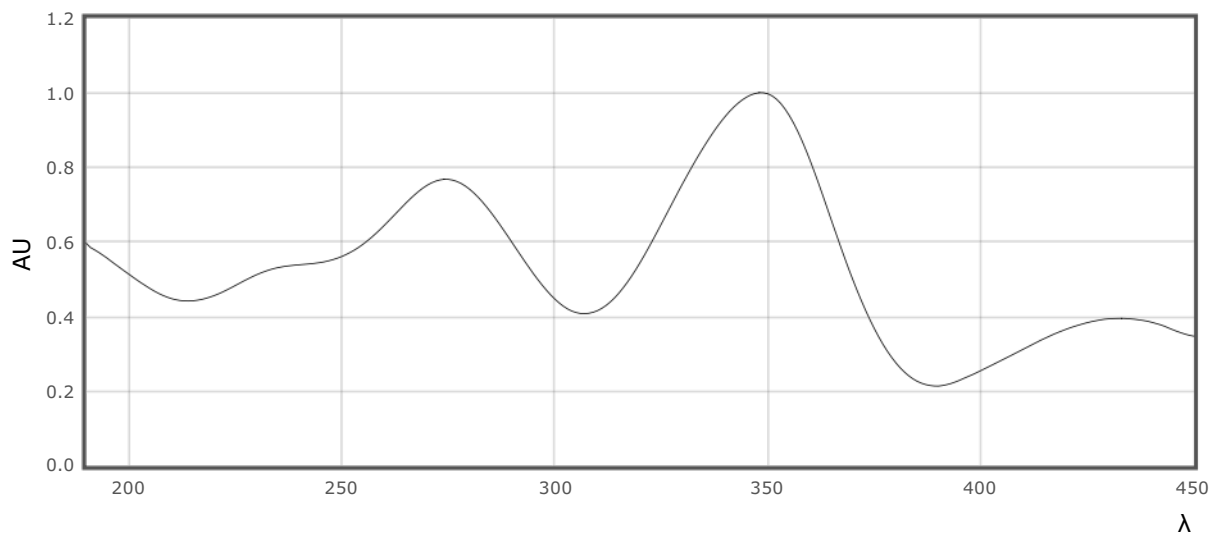

Tr. 8 Rf 0.489 (118.0 mm, 38.3 mm)

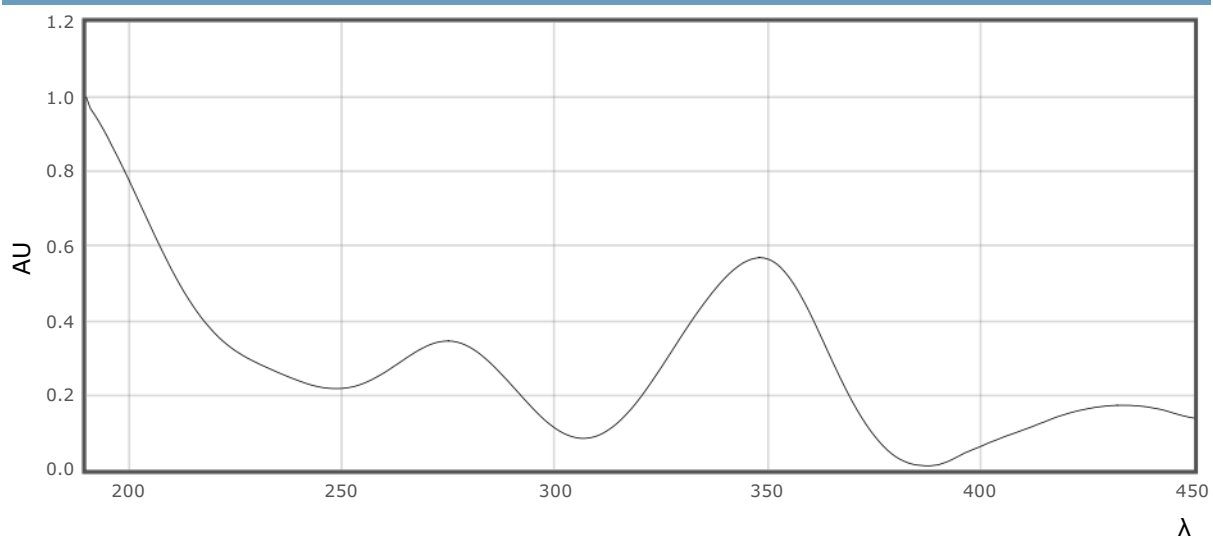

Tr. 9 Rf 0.490 (132.0 mm, 38.4 mm)

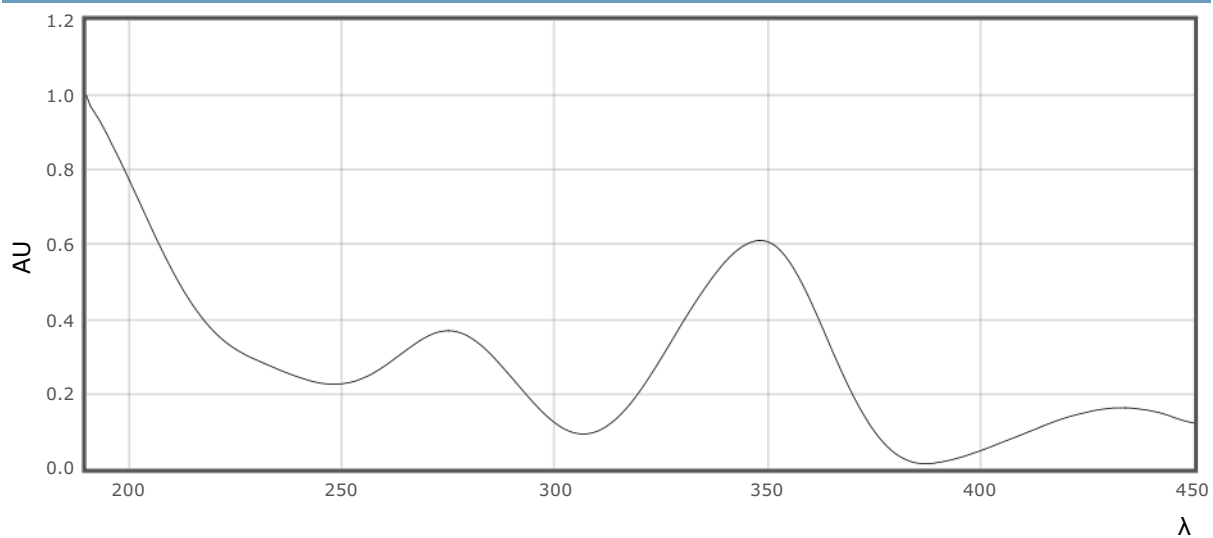

Tr. 10 Rf 0.502 (146.0 mm, 39.1 mm)

1819284\_20190302\_(P3)

visionCATS

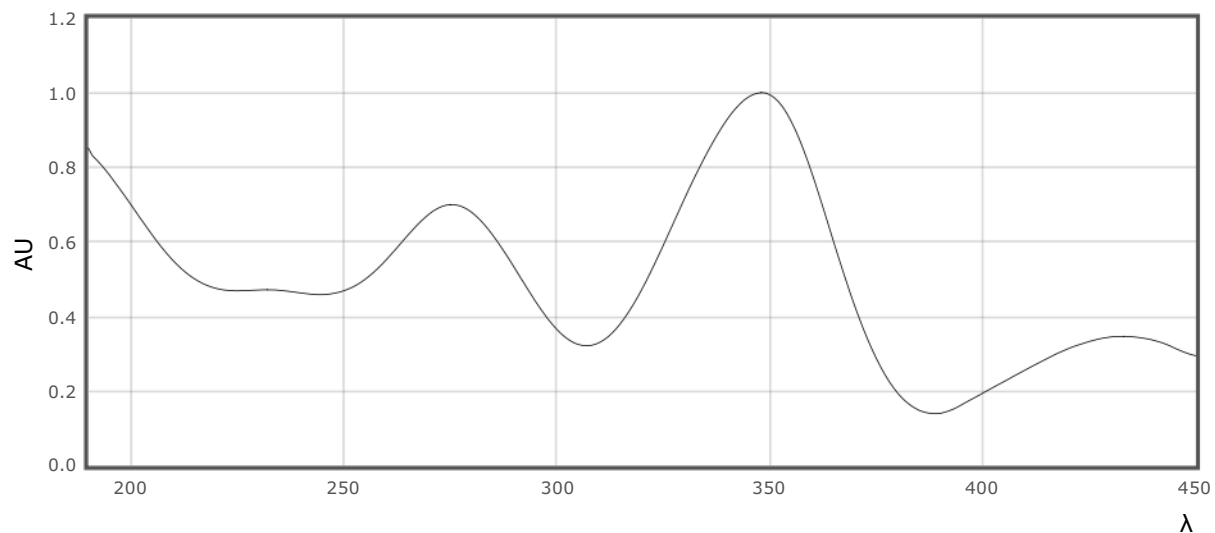

Tr. 11 Rf 0.505 (160.0 mm, 39.3 mm)

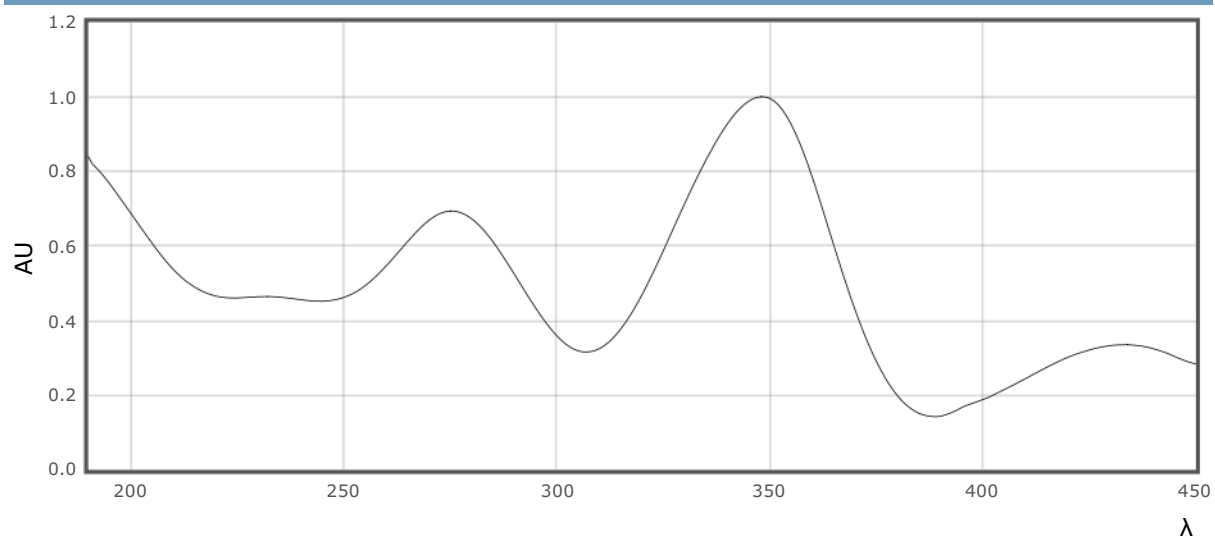

Tr. 12 Rf 0.506 (174.0 mm, 39.4 mm)

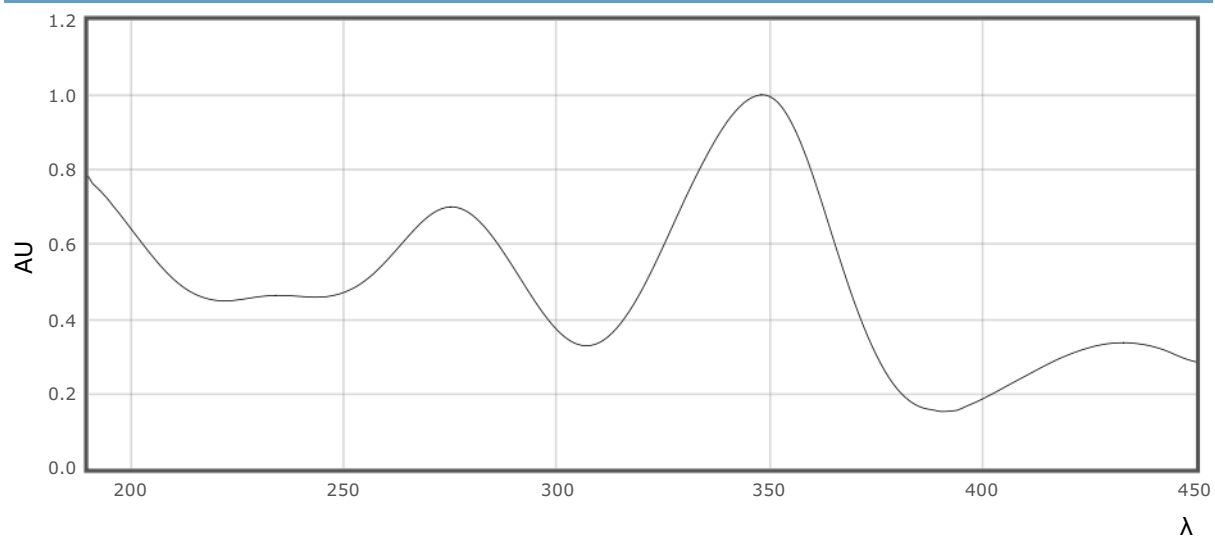

Spectrum correlation data:

1819284\_20190302\_(P3)

visionCATS

| Substance name | Track | Rf    | r(s,m)   | r(e,m)   | Ref. spectrum                       | Correlation |
|----------------|-------|-------|----------|----------|-------------------------------------|-------------|
| berberine HCl  | 1     | 0.485 | 0.000000 | 0.000000 | Tr. 2, Rf 0.481, Sub. berberine HCl | 0.903825    |
| berberine HCl  | 2     | 0.481 | 0.000000 | 0.000000 | Tr. 1, Rf 0.485, Sub. berberine HCl | 0.903825    |
| berberine HCl  | 3     | 0.482 | 0.000000 | 0.000000 | Tr. 2, Rf 0.481, Sub. berberine HCl | 0.984192    |
| berberine HCl  | 4     | 0.481 | 0.000000 | 0.000000 | Tr. 2, Rf 0.481, Sub. berberine HCl | 0.959389    |
| berberine HCl  | 5     | 0.481 | 0.000000 | 0.000000 | Tr. 2, Rf 0.481, Sub. berberine HCl | 0.933514    |
| berberine HCl  | 6     | 0.489 | 0.000000 | 0.000000 | Tr. 2, Rf 0.481, Sub. berberine HCl | 0.918923    |
| berberine HCl  | 7     | 0.492 | 0.000000 | 0.000000 | Tr. 2, Rf 0.481, Sub. berberine HCl | 0.897320    |
| berberine HCl  | 8     | 0.489 | 0.000000 | 0.000000 | Tr. 2, Rf 0.481, Sub. berberine HCl | 0.881638    |
| berberine HCl  | 9     | 0.490 | 0.000000 | 0.000000 | Tr. 2, Rf 0.481, Sub. berberine HCl | 0.911528    |
| berberine HCl  | 10    | 0.502 | 0.000000 | 0.000000 | Tr. 2, Rf 0.481, Sub. berberine HCl | 0.989198    |
| berberine HCl  | 11    | 0.505 | 0.000000 | 0.000000 | Tr. 2, Rf 0.481, Sub. berberine HCl | 0.988581    |
| berberine HCl  | 12    | 0.506 | 0.000000 | 0.000000 | Tr. 2, Rf 0.481, Sub. berberine HCl | 0.978085    |

## Evaluation 1 :

|                         |                         |
|-------------------------|-------------------------|
| Validated               | true                    |
| Step                    | Scan developed plate 1d |
| Concentration unit type | Mass / volume           |
| Notes                   |                         |

## Definition:

### References:

| RA1819284-01       |               |          |
|--------------------|---------------|----------|
| Substance Name     | Concentration | Purity   |
| berberine chloride | 100.000 µg/ml | 100.00 % |

## Samples:

| Vial ID      | Amount   | Volume solution | Reference amount | Related to |
|--------------|----------|-----------------|------------------|------------|
| SA1819284-01 | 1.000 mg | 1.00 ml         | 0.000 mg         |            |

## Integration parameters:

|                     |                                                                     |
|---------------------|---------------------------------------------------------------------|
| Bounds              | [0.000,1.000]                                                       |
| Smoothing           | Savitzky-Golay of order 3 and window 7                              |
| Baseline correction | Lowest slope with noise 0.05                                        |
| Profile subtraction | None                                                                |
| Peaks detection     | Gauss (legacy) with sensitivity 0.1, separation 1 and threshold 0.1 |

## Scan:

|            |        |
|------------|--------|
| Wavelength | 366 nm |
|------------|--------|

## Track 2:

|             |                               |
|-------------|-------------------------------|
| Type        | Reference                     |
| Vial ID     | RA1819284-01                  |
| Description | Berberine Chloride(0.1 mg/ml) |
| Volume      | 2.0 µl                        |

1819284\_20190302\_(P3)

visionCATS

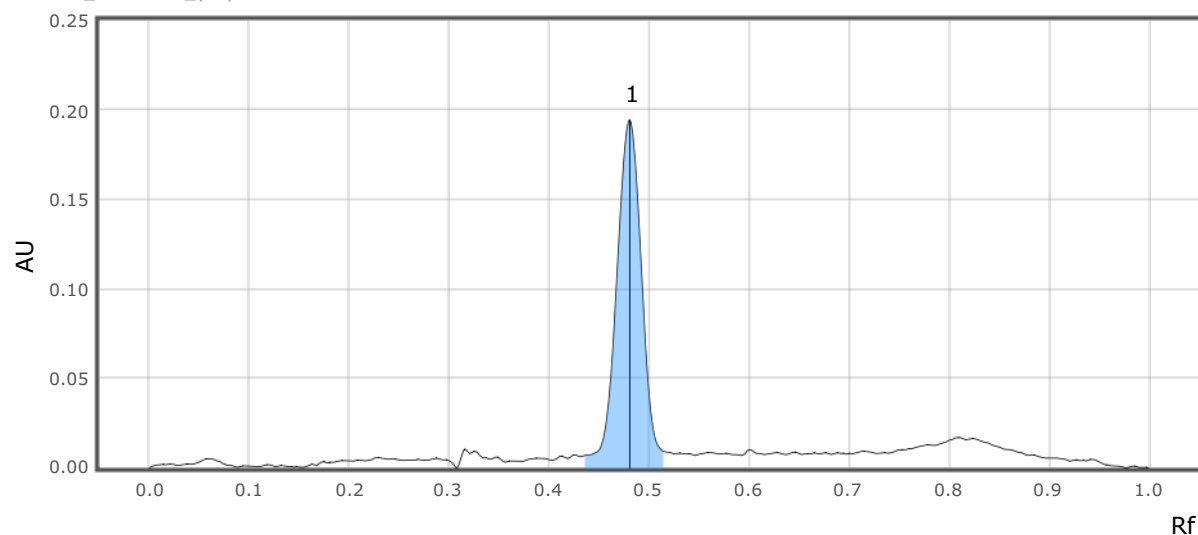

| Peak # | Start |        | Max   |        |        | End   |        | Area    |        | Manual peak | Substance Name     |
|--------|-------|--------|-------|--------|--------|-------|--------|---------|--------|-------------|--------------------|
|        | Rf    | H      | Rf    | H      | %      | Rf    | H      | A       | %      |             |                    |
| 1      | 0.434 | 0.0066 | 0.481 | 0.1942 | 100.00 | 0.515 | 0.0090 | 0.00567 | 100.00 | No          | berberine chloride |

#### Track 3:

|             |                               |
|-------------|-------------------------------|
| Type        | Reference                     |
| Vial ID     | RA1819284-01                  |
| Description | Berberine Chloride(0.1 mg/ml) |
| Volume      | 3.0 µl                        |

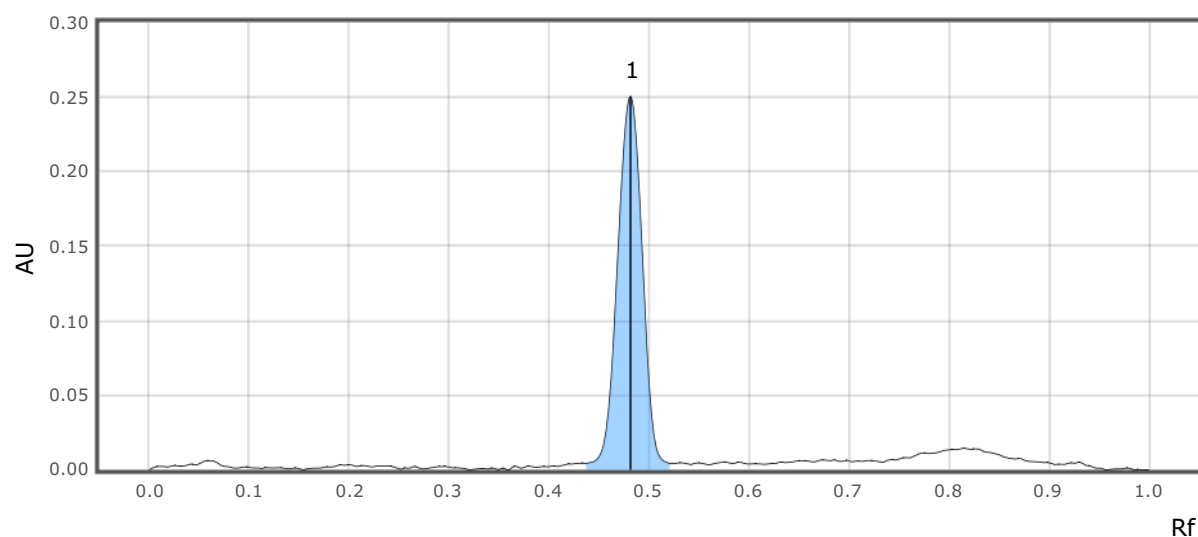

| Peak # | Start |        | Max   |        |        | End   |        | Area    |        | Manual peak | Substance Name     |
|--------|-------|--------|-------|--------|--------|-------|--------|---------|--------|-------------|--------------------|
|        | Rf    | H      | Rf    | H      | %      | Rf    | H      | A       | %      |             |                    |
| 1      | 0.437 | 0.0042 | 0.481 | 0.2501 | 100.00 | 0.521 | 0.0041 | 0.00723 | 100.00 | No          | berberine chloride |

#### Track 4:

|             |                               |
|-------------|-------------------------------|
| Type        | Reference                     |
| Vial ID     | RA1819284-01                  |
| Description | Berberine Chloride(0.1 mg/ml) |
| Volume      | 4.0 µl                        |

1819284\_20190302\_(P3)

visionCATS

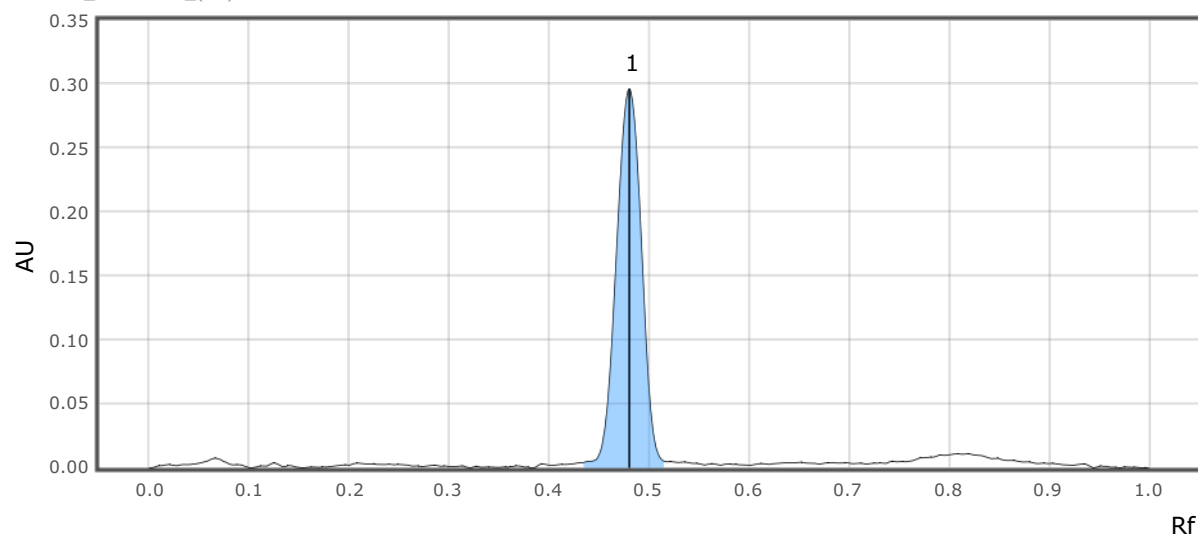

| Peak # | Start |        | Max   |        |        | End   |        | Area    |        | Manual peak | Substance Name     |
|--------|-------|--------|-------|--------|--------|-------|--------|---------|--------|-------------|--------------------|
|        | Rf    | H      | Rf    | H      | %      | Rf    | H      | A       | %      |             |                    |
| 1      | 0.433 | 0.0041 | 0.480 | 0.2960 | 100.00 | 0.517 | 0.0047 | 0.00868 | 100.00 | No          | berberine chloride |

#### Track 5:

|             |                               |
|-------------|-------------------------------|
| Type        | Reference                     |
| Vial ID     | RA1819284-01                  |
| Description | Berberine Chloride(0.1 mg/ml) |
| Volume      | 5.0 µl                        |

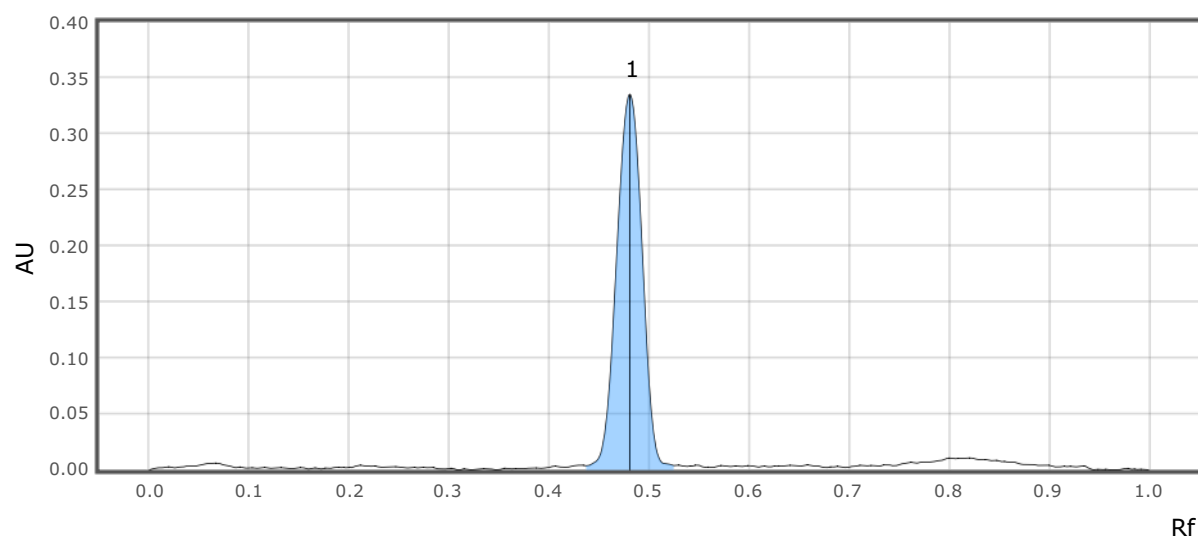

| Peak # | Start |        | Max   |        |        | End   |        | Area    |        | Manual peak | Substance Name     |
|--------|-------|--------|-------|--------|--------|-------|--------|---------|--------|-------------|--------------------|
|        | Rf    | H      | Rf    | H      | %      | Rf    | H      | A       | %      |             |                    |
| 1      | 0.437 | 0.0036 | 0.481 | 0.3354 | 100.00 | 0.525 | 0.0038 | 0.00996 | 100.00 | No          | berberine chloride |

#### Track 6:

|             |                               |
|-------------|-------------------------------|
| Type        | Reference                     |
| Vial ID     | RA1819284-01                  |
| Description | Berberine Chloride(0.1 mg/ml) |
| Volume      | 6.0 µl                        |



1819284\_20190302\_(P3)

visionCATS

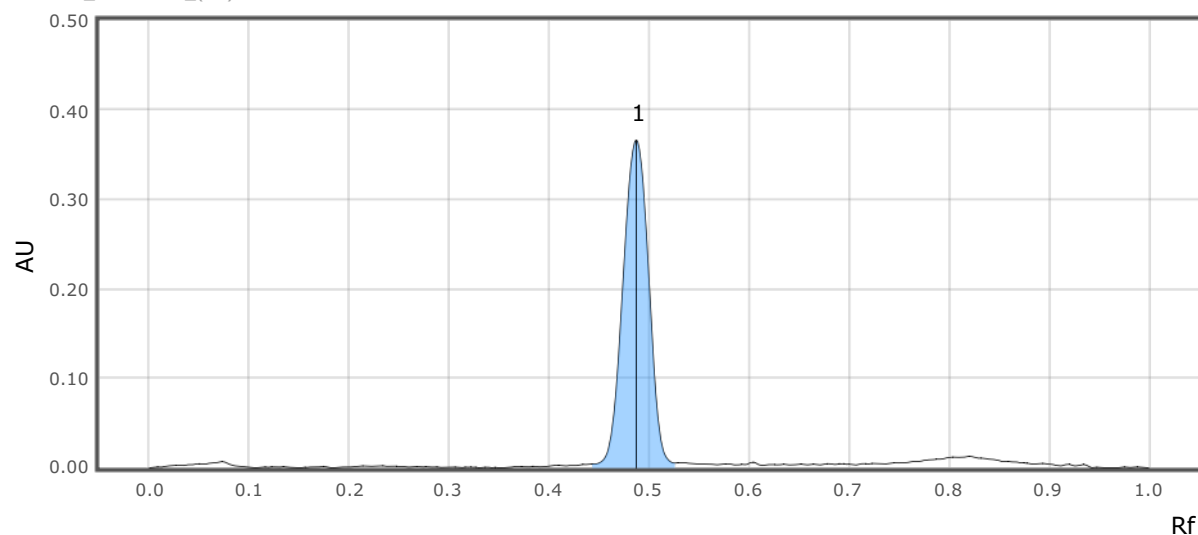

| Peak # | Start |        | Max   |        |        | End   |        | Area    |        | Manual peak | Substance Name     |
|--------|-------|--------|-------|--------|--------|-------|--------|---------|--------|-------------|--------------------|
|        | Rf    | H      | Rf    | H      | %      | Rf    | H      | A       | %      |             |                    |
| 1      | 0.438 | 0.0037 | 0.487 | 0.3659 | 100.00 | 0.526 | 0.0053 | 0.01096 | 100.00 | No          | berberine chloride |

#### Track 10:

|             |                                   |
|-------------|-----------------------------------|
| Type        | Sample                            |
| Vial ID     | SA1819284-01                      |
| Description | Berberis aristata(10 mg/ml)_1:100 |
| Volume      | 5.0 µl                            |

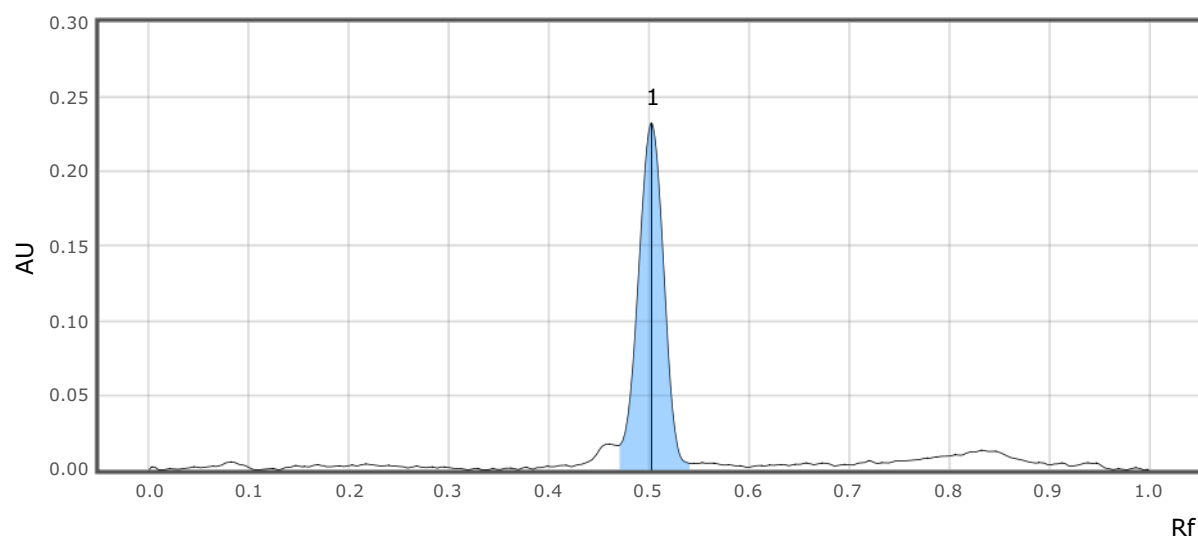

| Peak # | Start |        | Max   |        |        | End   |        | Area    |        | Manual peak | Substance Name     |
|--------|-------|--------|-------|--------|--------|-------|--------|---------|--------|-------------|--------------------|
|        | Rf    | H      | Rf    | H      | %      | Rf    | H      | A       | %      |             |                    |
| 1      | 0.469 | 0.0162 | 0.502 | 0.2323 | 100.00 | 0.541 | 0.0042 | 0.00690 | 100.00 | No          | berberine chloride |

#### Track 11:

|             |                                   |
|-------------|-----------------------------------|
| Type        | Sample                            |
| Vial ID     | SA1819284-01                      |
| Description | Berberis aristata(10 mg/ml)_1:100 |
| Volume      | 5.0 µl                            |

1819284\_20190302\_(P3)

visionCATS

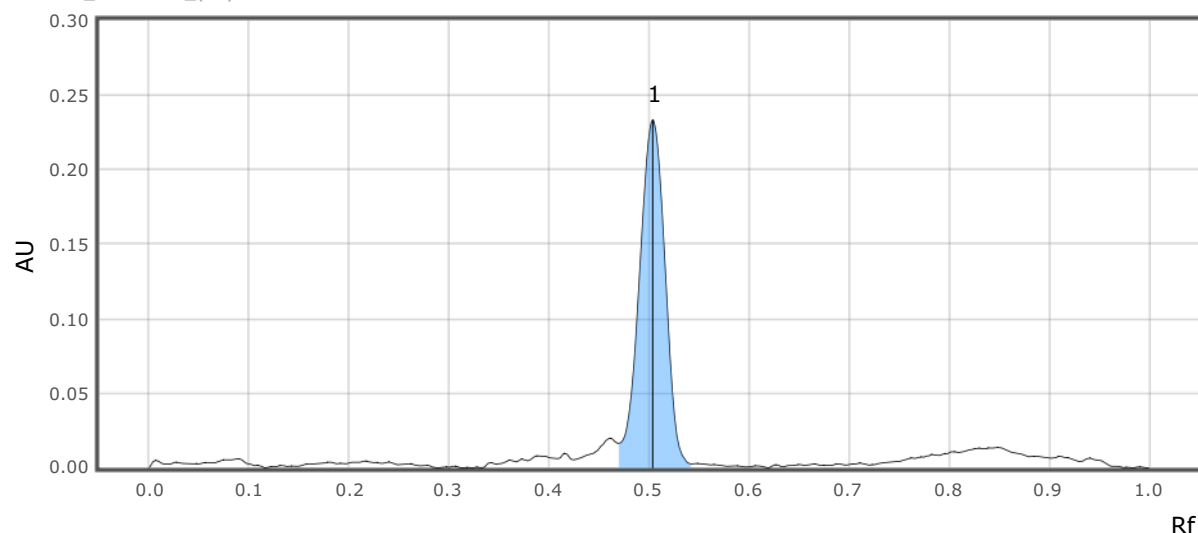

| Peak # | Start |        | Max   |        |        | End   |        | Area    |        | Manual peak | Substance Name     |
|--------|-------|--------|-------|--------|--------|-------|--------|---------|--------|-------------|--------------------|
|        | Rf    | H      | Rf    | H      | %      | Rf    | H      | A       | %      |             |                    |
| 1      | 0.470 | 0.0164 | 0.504 | 0.2330 | 100.00 | 0.542 | 0.0026 | 0.00695 | 100.00 | No          | berberine chloride |

## Calibration results:

Height calibration for substance berberine chloride @ 366 nm:

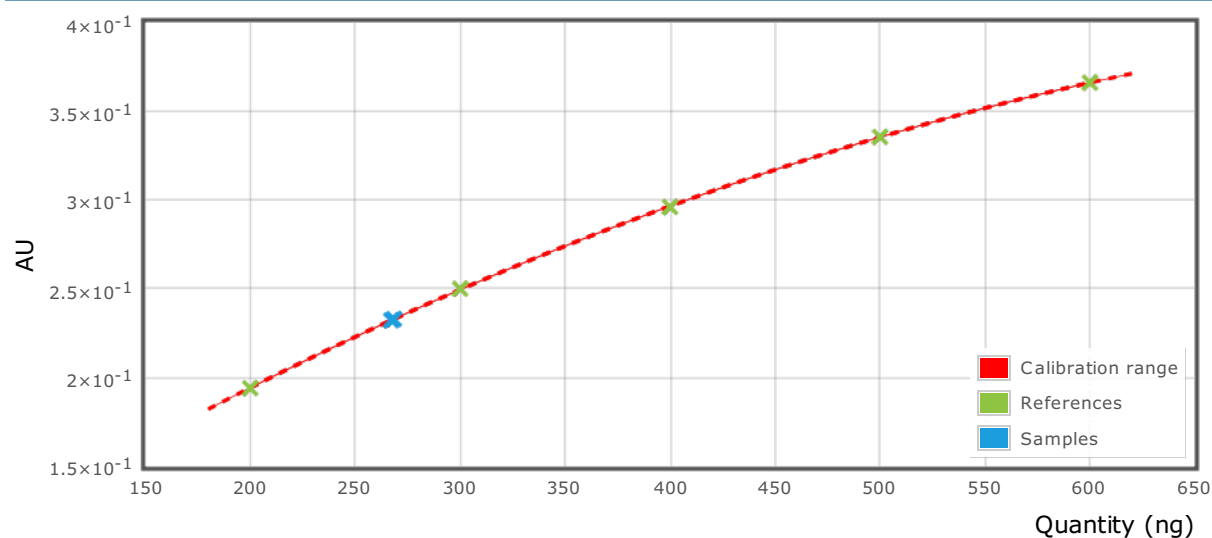

|                          |                                                                                  |
|--------------------------|----------------------------------------------------------------------------------|
| Regression mode          | Polynomial                                                                       |
| Range deviation          | 5.00 %                                                                           |
| Related substances       | Default                                                                          |
| Number of references     | 5                                                                                |
| Calibration function     | $y = -4.097 \times 10^{-13} x^2 + 7.566 \times 10^{-7} x + 5.943 \times 10^{-2}$ |
| Coefficient of variation | CV 0.12 %                                                                        |
| Correlation coefficient  | R=99.998448 %                                                                    |

## Results:

1819284\_20190302\_(P3)

visionCATS

| berberine chloride    |             | (2 sample assignments) @ 366 nm |                  |
|-----------------------|-------------|---------------------------------|------------------|
| Sample 'SA1819284-01' | 53.56 µg/ml | CV=0.34 %                       | (2 applications) |
|                       |             | 53.56 µg in 1.000 mg            |                  |
| Volume: 5.0 µl        | 53.56 µg/ml | CV=0.34 %                       | (2 replicas)     |
| Track 10              | 53.43 µg/ml | 267.2 ng                        |                  |
| Track 11              | 53.69 µg/ml | 268.4 ng                        |                  |

A track marked with ⚠ means: this result is outside the regression range given by the reference assignments, but is included in the results because it is in the allowed range deviation.

## Remarks

Conclusion: The Berberine chloride content in following sample is 53.5µg in 1 mg of solution which is approximately 5.4%.

### E-signed

#### Level: 1 - Lab Analyst

|           |                          |
|-----------|--------------------------|
| Signed by | Lab_Sneha                |
| Date      | 05-Mar-2019 11:34:51 UTC |
| Comment   | final result             |

#### Level: 2 - Asst. Lab Manager

|           |                          |
|-----------|--------------------------|
| Signed by | Lab_saikat               |
| Date      | 05-Mar-2019 11:35:07 UTC |
| Comment   | OK                       |
